# 1 **Balance between mutually exclusive traits shifted by variants of a yeast transcription factor**

2  
3 **Authors:** Michael W. Dorrity<sup>1,2</sup>, Josh T. Cuperus<sup>1,3</sup>, Jolie A. Carlisle<sup>1</sup>, Stanley Fields<sup>1,3,4\*</sup> and  
4 Christine Queitsch<sup>1\*</sup>

## 5 6 **Affiliations:**

7 <sup>1</sup> Department of Genome Sciences, University of Washington, Seattle, WA 98195

8 <sup>2</sup> Department of Biology, University of Washington, Seattle, WA 98195

9 <sup>3</sup> Howard Hughes Medical Institute, University of Washington, Seattle, WA 98195

10 <sup>4</sup> Department of Medicine, University of Washington, Seattle, WA 98195

11  
12 \* Correspondence to: queitsch@uw.edu and fields@uw.edu

13  
14 **Abstract:** In *Saccharomyces cerevisiae*, the decision to mate or invade relies on environmental  
15 cues that converge on a shared transcription factor, Ste12. Specificity toward invasion occurs via  
16 Ste12 binding cooperatively with the co-factor Tec1. Here, we characterize the *in vitro* binding  
17 preferences of Ste12 to identify a defined spacing and orientation of dimeric sites, one that is  
18 common in pheromone-regulated genes. We find that single amino acid changes in the DNA-  
19 binding domain of Ste12 can shift the preference of yeast toward either mating or invasion.  
20 These mutations define two distinct regions of this domain, suggesting alternative modes of  
21 DNA binding for each trait. Some exceptional Ste12 mutants promote hyperinvasion in a Tec1-  
22 independent manner; these fail to bind cooperative sites with Tec1 and bind to unusual dimeric  
23 Ste12 sites that contain one highly degenerate half site. We propose a model for how activation  
24 of invasion genes could have evolved with Ste12 alone.

## 25 26 **Introduction**

27 Transcription factors interact with DNA, with co-factors and with signaling proteins to allow  
28 cells to respond to changes in their environment. Despite the requirement to manage these  
29 multiple levels of regulation, most eukaryotic transcription factors possess a single DNA-binding  
30 domain. Distinct responses must therefore be mediated by diversity in co-factors, organizations  
31 of binding sites and conformational changes in the transcription factor itself. For example,  
32 human GCM1 gains a novel recognition sequence when paired with the ETS family factor ELK1  
33 (1); auxin-responsive transcription factors regulate expression differentially depending on the  
34 arrangement of their binding sites (2); and the heat shock factor Hsf1 senses increased  
35 temperature by changing its conformation, which allows it to bind a unique recognition sequence  
36 (3).

37  
38 We sought to investigate the features of a single transcription factor that uses distinct co-factors,  
39 binding sites and environmental inputs to mediate a cellular decision. The Ste12 protein of the  
40 yeast *Saccharomyces cerevisiae* governs the choice of mating or invasion. Each of these traits  
41 contributes to cellular fitness: mating of haploid yeast cells is required for meiotic  
42 recombination, and invasion allows a cell to forage for nutrients or to penetrate tissues, a  
43 characteristic of pathogenic fungi. Mating is initiated by binding of the appropriate pheromone,  
44 which activates an evolutionarily conserved G-protein-coupled MAPK pathway (4, 5) (Fig. 1A).  
45 By contrast, invasion is initiated in response to increased temperature and limited nutrient

46 availability (6–8). The shared MAPKKK Ste11, a client of the chaperone Hsp90 (9), likely  
47 contributes to the environmental sensitivity of both traits.

48  
49 Specificity between mating and invasion pathways is generated at multiple levels. For example, a  
50 mating-specific scaffold protein, Ste5, guides kinase signal transduction to activate mating (10).  
51 Two MAP kinases, Fus3 and Kss1, have overlapping functions in mating but opposing functions  
52 in invasion (5). The two pathways converge on Ste12, which interacts differentially with  
53 cofactors to activate either mating or invasion. For mating, Ste12 can bind at pheromone-  
54 responsive genes as a homodimer or with the cofactors Mcm1 or Mata1 (11–13). The consensus  
55 DNA-binding site of Ste12 is TGAAAC, known as the pheromone response element (PRE) (11).  
56 For invasion, Ste12 and its co-factor Tec1 are both required to activate genes that mediate  
57 filamentation (8, 14, 15). Some of these genes contain a Ste12 binding site near a Tec1  
58 consensus sequence (TCS) of GAATGT, an organization for heterodimeric binding known as a  
59 filamentation response element (FRE). An alternative model, however, posits that expression of  
60 invasion genes is driven by a complex of Ste12 and Tec1, acting solely through Tec1 binding  
61 sites (15). An environmental component of trait specificity has been shown in fungi that are  
62 animal pathogens; upon recognition of host body temperature (37°C) (6), *Cryptococcus*  
63 *neoformans* has decreased mating efficiency, but increased ability to invade (16). Although trait  
64 preference in *S. cerevisiae* depends on Ste12, its role in regulating mating and invasion in  
65 response to increased temperature is unknown.

66  
67 Because the highly conserved Ste12 DNA-binding domain ultimately enacts the choice between  
68 mating and invasion, here we sought to precisely define its DNA-binding specificity and  
69 examine the consequences of mutations and increased temperature on the balance of these traits.  
70 We reveal distinct organizational preferences for both homodimeric binding sites and  
71 cooperative heterodimeric binding sites with Tec1. Further, single amino acid changes suffice to  
72 shift the preference of yeast cells toward one or the other trait; they also suffice to confer  
73 dependence on the chaperone Hsp90 and responsiveness to higher temperature. Some of the  
74 hyperinvasive separation-of-function mutations are independent of the co-factor Tec1, thought to  
75 be essential for invasion. We show that these Ste12 variants bind to homodimeric Ste12 binding  
76 sites in which one site is highly degenerate. Such a binding preference provides a plausible  
77 mechanism to activate the expression of invasion genes in a Tec1-independent manner, and  
78 provides a model for the regulation of these genes in the many fungal species that have no copy  
79 of *TEC1*.

## 80 81 **Results**

### 82 ***STE12* is present in nearly all fungal genomes, but most lack a *TEC1* orthologue.**

83 As the target of two different MAPK signaling cascades, Ste12 acts to define pathway specificity  
84 at the level of transcription (Fig. 1A). This role in both mating and invasion appears to be  
85 conserved in other fungal species, and presumably derives from properties of its DNA-binding  
86 domain, the most conserved segment of the protein (Fig. 1B) (17). Although the Ste12 DNA-  
87 binding domain has no match outside of the fungal kingdom, several residues as well as the  
88 overall predicted secondary structure are conserved in fungi (Fig. 1B, 1C). We addressed the co-  
89 occurrence of Ste12 and Tec1 by examining 1229 fungal species for the presence or absence of  
90 these two genes. Nearly every fungal species contains a copy of *STE12* (97.7% of species), while  
91 fewer than one third (31.7%) appear to have a copy of *TEC1* (Fig 1 - Suppl. Fig. 1). Furthermore,



92 even among fungal pathogens with a characterized role for Ste12 in invasion, we found several  
93 examples in which a *TEC1* gene is not present (Fig. 1D). Therefore, fungal species must have  
94 evolved Tec1-independent strategies to regulate mating and invasion.

95  
96 We tested the extent to which Ste12 and Tec1 binding at adjacent sites within filamentation  
97 response elements could explain invasion-specific activation by Ste12 DNA in *S. cerevisiae*.  
98 Cooperative binding at adjacent (within 24 bp) Ste12 and Tec1 binding sites (FREs) has been  
99 demonstrated *in vivo* and *in vitro* (18), although most invasion genes do not contain FREs (15).  
100 For all promoter sequences in *S. cerevisiae*, we assessed the frequency and spacing of sites, and  
101 called adjacent sites (<24 bp). We found 792 unique promoters with matches ( $p < 1e^{-4}$ ) to a  
102 Ste12 binding site, with 220 (27.8%) of these also having a Tec1 binding site (Fig. 1E). The  
103 median distance between Ste12 and Tec1 sites is 360 base pairs, and only twelve pairs of sites  
104 (5%) are within 24 base pairs of each other (Fig. 1F). Among these twelve, four have  
105 overlapping motifs consisting of a tail-to-tail arrangement, with the Tec1 motif overlapping the  
106 3' end of the Ste12 motif (Fig. 1F); this organization is more likely than non-overlapping sites to  
107 occur by chance and may not be functional, though overlapping sites have been observed in  
108 cooperative binding of mammalian transcription factors (1). The small number of sites organized  
109 for cooperative binding with Tec1 contrasts with the hundreds of genes upregulated under  
110 invasion conditions (19, 20) as well as with the dozens of genes bound by Ste12 under invasion  
111 conditions (57 genes unique to invasion, 100 overall) (14). Thus, the model of Ste12 and Tec1  
112 cooperatively binding to FREs within invasion genes cannot alone account for the broad  
113 transcriptional response during invasion observed in *S. cerevisiae*. Specificity may derive from  
114 instances of long-range looping interactions, or binding of Ste12 to DNA indirectly through its  
115 interaction with Tec1 bound at Tec1 consensus sequences (15). However, given the absence of  
116 Tec1 in many species, this model is also unlikely to be applicable in fungi more broadly.

### 117 118 **Ste12 and Tec1 preferentially bind DNA in defined spacings and orientations.**

119 Because the yeast genome contains few filamentation response elements, we sought to determine  
120 at high-resolution the *in vitro* DNA-binding preferences of Ste12 and Tec1. We used high-  
121 throughput systematic evolution of ligands by exponential enrichment (HT-SELEX) (1, 21, 22)  
122 with a random sequence of 36 base pairs, which allowed us to capture instances of Ste12 and  
123 Tec1 binding sites in all orientations and at every possible spacing of 24 base pairs or fewer. In  
124 the Ste12 sample, we captured monomeric or homodimeric instances of the expected Ste12  
125 binding site of TGAAAC, with dimeric sites found 20-fold more frequently than monomeric  
126 sites (Fig. 2 - Suppl. Fig. 1C). Many transcription factors exhibit strong preferences for spacing  
127 and orientation of sites, and this preference is conserved within transcription factor families (1,  
128 22). Ste12 showed a strong preference (33% of 2,229,168 bound output sequences) for tail-to-tail  
129 binding sites with a three base pair spacer (Fig. 2A, top). While the most enriched sequences  
130 contained two perfect TGAAAC sites with this spacing (Fig. 2B, top), most of these sequences  
131 contained one perfect TGAAAC site paired with a mismatched site. This strong spacing  
132 preference had not been identified in previous protein binding microarray studies, which used  
133 shorter target sequences (23), but is consistent with the known binding of Ste12 as a homodimer  
134 (24). We found two instances of homodimeric sites with a perfect TGAAAC pair in the *S.*  
135 *cerevisiae* genome: in the promoters of *GPAL1*, encoding the  $\alpha$ -subunit of the G protein involved  
136 in pheromone response, and of *STE12* itself (Fig. 2C). Gpa1 and Ste12 are a component of the  
137 initial signaling point after pheromone sensing and the ultimate transcription target of the MAPK

138 signaling cascade, respectively, and both are among the most highly induced genes in response to  
139 pheromone (25). Elsewhere in the genome, three base pair-spaced sites in which one site is  
140 perfect and one is mismatched are found within several known pheromone-regulated genes. This  
141 configuration occurs in 29 genes in the *S. cerevisiae* genome, and 12 of the 50 most pheromone  
142 induced genes contain these sites (examples in Fig. 2C). To analyze the ability of these sites to  
143 drive Ste12-dependent expression, we used a reporter assay in yeast. The *in vitro* preferences for  
144 the dimeric sites, as well as for the base flanking the TGAAAC motifs, correlated with *in vivo*  
145 activation (Fig. 2 – Suppl. Fig. 1A, 1B).

146  
147 HT-SELEX with Tec1 protein recapitulated the known binding site of (A/G)GAATGT (Fig. 2B,  
148 middle panel) (26). We found that the first base of this motif showed a strong preference for a  
149 purine base, and that the final T showed less specificity than the rest of the motif. Unlike with  
150 Ste12, we did not observe any spacing and orientation preferences for two Tec1 sites, indicating  
151 that bound sequences with multiple Tec1 binding sites are likely the result of independent  
152 binding events (Fig. 2A, middle panel).

153  
154 We next conducted HT-SELEX in the presence of both Ste12 and Tec1 to identify patterns of  
155 cooperative binding events between the two proteins. The DNA-binding domain of Ste12 (1-  
156 215) is sufficient for cooperative binding with Tec1 (1-280) *in vitro* (26, 27). We detected bound  
157 sequences containing sites for both proteins, with the highest abundance preference being a tail-  
158 to-head orientation of Tec1 and Ste12 sites separated by two base pairs (Fig. 2A, 2B, lower  
159 panel; Fig. 2 - Suppl. Fig. 2.). Several known invasion genes in the *S. cerevisiae* genome contain  
160 this type of heterodimeric site, though some other genes with this binding site organization have  
161 not been previously associated with invasion (Fig. 2D). This arrangement is similar to  
162 homodimeric Ste12 sites, except that one Ste12 site is replaced by a Tec1 site, indicating a  
163 similar protein interaction surface may be used for this heterodimeric binding mode of Ste12 as  
164 is used for the homodimeric binding mode. However, even in this sample, the pool of bound  
165 sequences was dominated by two Ste12 sites with three base pair spacing, suggesting that Ste12  
166 has higher affinity to two PRE sites than to an FRE requiring binding with Tec1.

### 167 168 **Mutations in the DNA-binding domain of Ste12 separate mating and invasion functions.**

169 The organization of DNA-binding sites selected by Ste12 alone or in combination with Tec1  
170 suggested that Ste12 balances the expression of mating and invasion genes by its mode of  
171 binding to DNA. We sought to determine whether this balance could be shifted by mutations  
172 within the Ste12 DNA-binding domain. We conducted deep mutational scanning (28) of a  
173 segment of this domain by generating ~20,000 protein variants over 33 amino acids, including  
174 single, double, and higher order mutants, and subjected yeast cells carrying this variant library to  
175 selection for either mating or invasion (Fig. 3A; Fig. 3 – Suppl. Fig. 1; Fig. 3 – Suppl. Fig. 2A,  
176 2B). As a control, we employed selection for a third trait, response to osmotic stress, which  
177 shares upstream pathway components but does not involve Ste12. Mating selections and osmotic  
178 stress selections were carried out in the BY4741 strain background. However, as this strain  
179 contains a *flo8* mutation that prevents invasion, we carried out invasion selections in a related  
180 strain, Sigma1278b (29), which has been used for large-scale invasion phenotyping (30).  
181 Although Sigma1278b and BY4741 have many genetic differences, Ste12 and Tec1 and their  
182 essential roles in balancing mating and invasion are conserved between the two strains.

183

184 We expected that most *STE12* mutations would affect mating and invasion similarly, because of  
185 the conservation of the Ste12 DNA-binding domain and its requirement for both traits. Indeed,  
186 we found positions in which almost any amino acid substitution was highly deleterious to both  
187 mating and invasion (Fig. 3B, 3C; Fig. 3 - Suppl. Fig. 2). We identified sites that were more  
188 sensitive or less sensitive, on average, to mutation, by calculating a positional mean score from  
189 all mutations tested at that site. Each mutation was tested in triplicate, and the experimental error  
190 was calculated for each mutant individually such that standard error of the positional mean  
191 represents the variability among different amino acid substitutions, rather than experimental  
192 noise (Fig. 3C, Fig. 3 – Suppl. Fig. 1E). Conservation only partially explained these results, as  
193 some of the most deleterious positions are invariant among fungi (W156, C144), whereas others  
194 are not (K149, Q151, K152). Differing expression levels among STE12 variants were not  
195 predictive for either mating or invasion phenotypes (Fig. 3 – Suppl. Fig. 3).

196  
197 The mutational analysis revealed “separation-of-function” mutations, which primarily reduced  
198 either mating or invasion. Substitutions with mostly deleterious effects on mating clustered in  
199 residues N-terminal to the conserved W156 (Fisher’s exact test p-value = 0.002, designated  
200 region I), while substitutions with increased effects on invasion appeared more frequently in this  
201 region (p-value = 0.0003). Substitutions that increased mating were rare. By contrast,  
202 substitutions at some positions, almost all within region I, both increased invasion and decreased  
203 mating. We verified separation-of-function mutants, and further explored the apparent structure  
204 of mutational effects with a much larger pool of 20,000 double mutants. Double mutants  
205 involving two positions in region I were mostly defective for mating, while those involving two  
206 positions in region II were mostly defective for invasion, confirming the bipartite arrangement of  
207 the mutagenized segment, split by the central W156 (p-value = 1.3e-5, Fig. 4A). Double mutants  
208 between regions I and II showed variability in mutational effects, with some pairwise  
209 combinations increasing mating and others decreasing mating; the effects on invasion, however,  
210 for these same combinations did not follow the same pattern, suggesting epistatic interactions  
211 (examples highlighted in Fig. 4A, Fig. 4 – Suppl. Fig. 1). Thus, mutations in the Ste12 DNA-  
212 binding domain can impose preference for mating or invasion rather than similarly affecting both  
213 traits, suggesting that the DNA-binding domain itself contributes to trait specificity.

214  
215 To explore the apparent tradeoff between mating and invasion in more detail, we used the Pareto  
216 front concept (31). This concept, rooted in engineering and economics, defines all feasible  
217 solutions for optimizing performance in two essential tasks. Here, we consider all feasible  
218 genotypes that affect mating or invasion. We plotted the single mutation mean positional scores  
219 for both traits, identifying positions close to the Pareto front that show increased invasion and  
220 deleterious effects on mating. (Fig. 4B, Fig. 4 – Suppl. Fig. 2). We find this effect is  
221 recapitulated in the effects of individual mutants tested in both trait selections at extreme  
222 positions on the front (Fig. 4 – Suppl. Fig. 3). Positions well below the Pareto front, including  
223 most prominently W156, had deleterious effects on both traits. These positions are significantly  
224 more conserved among fungi, consistent with variation at these sites being disfavored given the  
225 constraint on Ste12 to maintain both mating and invasion function in the fungal lineage (Fig.  
226 4C). That opposing preference for each trait is better predicted by positional means than every  
227 individual mutation suggests that trait preference is encoded in particular functional regions of  
228 the Ste12 DNA-binding domain rather than through overall features like protein stability.

229

230 Having established that trait preference can be modulated by mutations in Ste12, we asked  
231 whether temperature affected specificity toward mating and invasion, and if that specificity could  
232 be altered by mutation. Furthermore, since chaperones maintain protein function at increased  
233 temperatures and Hsp90 modulates pheromone signaling in *S. cerevisiae* (9), we also asked  
234 whether mating or invasion changed in the presence of radicicol, a pharmacological inhibitor of  
235 Hsp90. We confirmed that mating is modulated by temperature and by Hsp90 function by mating  
236 cells expressing wild-type Ste12 at increased temperature or in the presence of radicicol (Fig.  
237 4D). We then subjected the Ste12 variant library to mating selection at 37°C or in the presence of  
238 radicicol. Most Ste12 variants responded to increased temperature or Hsp90 inhibition as did  
239 wild-type Ste12 (Fig. 4 – Suppl. Fig. 5). However, there were two positions, K150 and K152, in  
240 which mutations resulted in highly temperature-responsive and Hsp90-dependent mating (Fig.  
241 4E). This pair of lysines resides within the mutagenized segment that modulates mating and  
242 invasion specificity. We validated the temperature and Hsp90 effect on a variant (K150I) that  
243 conferred mating at near wild-type levels in the absence of heat or radicicol treatment (Fig. 4F).  
244 However, in the presence of heat or radicicol treatment, mating of cells with the K150I variant  
245 was severely decreased, indicating that this mutation led to buffering by Hsp90. Thus, Hsp90  
246 could facilitate a mutational path toward the pathogenic lifestyle by minimizing mating costs at  
247 30°C and enhancing invasion at 37°C. To test this idea, we conducted selection for invasion at  
248 37°C, which yielded results comparable to Hsp90 inhibition for mating. Indeed, the mean effect  
249 of all variants at K150 was to increase invasion at high temperature with a concomitant decrease  
250 in mating, and this was also true of the individually validated variant K150I (Fig. 4G),  
251 demonstrating that K150 variants were not simply unstable at high temperature but gained a  
252 novel function. Thus, mutations in Ste12 can interact with an environmental factor to further bias  
253 cellular decision-making toward invasion over mating. Mutation to Ste12 thereby allows *S.*  
254 *cerevisiae* to mimic the behavior of fungal pathogens like *Cryptococcus neoformans*, for which  
255 the sensing of the increased body temperature of their animal hosts facilitates the transition  
256 toward an invasive lifestyle (7).

257  
258 We examined whether natural variation in fungal Ste12 DNA-binding domains includes amino  
259 acid residues found to affect *S. cerevisiae* trait preference, as fungal species have differential  
260 capacities for mating and invasion (17, 32). We examined variation in the DNA-binding domain  
261 present in species with and without a *TEC1* gene (Fig. 5 – Suppl. Fig. 1) and detected variation  
262 outside of the mutagenized region that might be expected to benefit invasion. For example, the  
263 Ste12 DNA-binding domain of the invasive pathogen *Cryptococcus gattii* (33) contains two  
264 additional positive residues immediately C-terminal to region II; such changes are found in many  
265 other species that lack Tec1 (Fig. 5 – Suppl. Fig. 1). Introducing these *C. gattii*-specific residues  
266 (S177K, Q180R; denoted SKQR) into the *S. cerevisiae* Ste12 DNA-binding domain yielded a  
267 dominant invasion phenotype (Fig. 5A) and decreased mating (Fig. 4 – Suppl. Fig. 4) in *S.*  
268 *cerevisiae*. We introduced a negatively charged residue (K175E) into this same region and  
269 abolished invasion entirely (Fig. 5A). Similarly to SKQR, the region I mutation K150A  
270 conferred decreased mating and an increase in invasion. The mating defect and dominant  
271 invasion phenotype for each variant suggest that these Ste12 variants engage in altered binding to  
272 DNA, altered homodimerization, or altered heterodimerization with Tec1.

273  
274



275 **Mutations in Ste12 can promote Tec1-independent invasion and alter DNA-binding**  
276 **specificity.**

277 Tec1 activates invasion genes, with Ste12 either binding directly to DNA cooperatively with  
278 Tec1 or indirectly as part of a complex with Tec1 (14, 15). However, in contrast to both  
279 established Ste12 binding modes, the invasion phenotype due to the SKQR variant was  
280 independent of Tec1, as was the even stronger invasion phenotype due to the K150A variant  
281 (Fig. 5A). Thus, a single mutation in the Ste12 DNA-binding domain might change the binding  
282 preference of this domain such that it can be recruited in the absence of Tec1 to binding sites  
283 sufficient for invasion.

284  
285 To understand the relationship between the phenotypes conferred by Ste12 variants and their  
286 DNA-binding specificity, we conducted HT-SELEX experiments. We chose the SKQR and  
287 K150A variants, each of which conferred a mating defect, and asked whether they could  
288 recognize the homodimeric Ste12 sites favored by the wild-type protein. SKQR showed a greatly  
289 reduced (by 45%) preference for two sites separated by three base pairs (Fig. 5B). Consistent  
290 with this reduced preference, SKQR conferred reduced activation *in vivo* from a minimal  
291 promoter containing such homodimeric sites (Fig. 5 - Suppl. Fig. 2A). Furthermore, an  
292 examination of the most enriched sequences bound *in vitro* by the SKQR variant showed that it  
293 lost specificity for the sequence of the second site; this was also reflected in its *in vivo* sequence  
294 preference (Fig. 5D, Fig 5 – Suppl. Fig. 5B). In contrast, K150A retained a strong preference for  
295 the three base-pair spaced sites, nearly identical to wild-type Ste12 (Fig. 5B). However, analysis  
296 of its most enriched sequences revealed that, like SKQR, the K150A variant showed reduced  
297 specificity for one site of the homodimeric pair (Fig. 5D). The reduced specificity in these  
298 variants should expand the number of their recognition sites. Because both of these variants  
299 recognized at least one perfect, or near perfect, Ste12 site, we conclude that the primary defect in  
300 these variants derives not from loss of specific DNA contacts, but rather from their diminished  
301 capacity for symmetric dimeric binding.

302  
303 We also carried out co-binding SELEX experiments with Tec1, as previously conducted with  
304 wild-type Ste12 (reproduced in Figure 5C, top). Consistent with their ability to promote Tec1-  
305 independent invasion, both SKQR and K150A showed altered patterns of cooperative binding  
306 with Tec1. K150A showed no preference for the two base pair-spaced heterodimeric sites  
307 favored by the wild-type Ste12 in co-binding experiments with Tec1, and SKQR had a greatly  
308 reduced preference for these motifs (Figure 5C).

309  
310 **Discussion**

311 Fungal species make the decision to mate or invade based on environmental cues such as  
312 temperature, with the choice enacted through trait-specific transcription factors (8). In *S.*  
313 *cerevisiae*, the highly conserved Ste12 protein drives expression of mating genes as a homodimer  
314 and of invasion genes as a heterodimer with the invasion co-factor Tec1; the two proteins bind  
315 cooperatively to DNA (18). However, few invasion genes contain Ste12 and Tec1 binding sites  
316 spaced closely enough to plausibly allow efficient heterodimeric binding as the basis of trait  
317 specificity. One model that explains the scarcity of cooperative binding sites is based on the  
318 finding that Tec1 alone can bind to invasion genes, which then recruits Ste12 to provide  
319 activation activity without Ste12 itself binding DNA (15). However, only about a third of 1229  
320 sequenced fungi contain a *TEC1* orthologue; moreover, the vast majority of these fungi contain



321 only a single *STE12* gene, excluding *STE12* gene duplication and subsequent sub-  
322 functionalization as a prominent mechanism of achieving trait specificity.

323  
324 Here, we show that single mutations in Ste12 are sufficient to shift yeast trait preference toward  
325 invasion. One possible explanation for how such mutations separately affect the two traits is that  
326 they alter the interaction of Ste12 with Tec1. However, this explanation cannot be valid, as the  
327 hyperinvasive Ste12 variants were independent of Tec1 presence. This Tec1-independent  
328 phenotype provides a plausible mechanism for how fungal species without Tec1 or similar co-  
329 factors accomplish activation of invasion genes. Indeed, the S177K change in the Ste12 of *C.*  
330 *gatti* causes a hyperinvasive phenotype when introduced into the Ste12 of *S. cerevisiae* and is  
331 more frequently found in fungal species without Tec1 (Fig. 5 - Suppl. Fig. 1). In contrast, there is  
332 little natural variation in the positions of Ste12 in which mutations shift trait preference towards  
333 invasion and change the response to temperature and Hsp90 inhibition. Such conservation  
334 suggests that most fungal species have retained the capacity for both invasion and mating, even  
335 though many have not yet been found as diploids. Further, our finding of dominant  
336 hyperinvasive Ste12 variants points to an explanation for the near universal absence of Ste12  
337 duplication and sub-functionalization: Ste12 paralogs optimized for invasion in this manner  
338 would likely suppress mating.

339  
340 Just as single mutations could eliminate Ste12 dependence on Tec1 for driving gene expression,  
341 they could also change the response of Ste12 to temperature. Increased temperature, reflecting  
342 the body temperature of animal hosts, can promote invasion of fungal pathogens (7). Even in the  
343 non-pathogenic *S. cerevisiae*, high temperature decreases mating and promotes invasion.  
344 Mutations at the same positions in Ste12 implicated in shifting trait preference could also alter  
345 dependence on temperature and the chaperone Hsp90. The temperature- and Hsp90-dependent  
346 variants did not resemble typical temperature-sensitive mutants in simply losing function under  
347 non-permissive conditions; in response to high temperature or Hsp90 inhibition, these variants  
348 failed to promote mating yet conferred an increased ability to invade. These variants thus  
349 represent the unusual phenomenon whereby perturbation of Hsp90 or equivalent environmental  
350 stress results in a protein gaining a novel function at the cost of another, whereas more typically,  
351 mutated proteins (such as many oncogenic kinases) are enabled to function by Hsp90 and fail to  
352 do so in response to high temperature or Hsp90 inhibition (34, 35).

353  
354 Although Hsp90 broadly buffers the phenotypic consequences of genetic variation, only a  
355 handful of Hsp90-dependent variants have been mapped to date, limiting our understanding of  
356 their prevalence and biological significance (36, 37). As the consequences of human disease  
357 mutations increasingly are found to be dependent on Hsp90, deep mutational scanning provides a  
358 possible experimental avenue to systematically identify features of Hsp90-dependent variation  
359 (38, 39). In Ste12, such mutations are rare and position-dependent, consistent with their effects  
360 on protein folding. Yet the Hsp90-dependent Ste12 variants are accessible via a single mutation,  
361 suggesting that the chaperone could facilitate a mutational path toward a pathogenic fungal  
362 lifestyle by minimizing mating costs at normal temperature and enhancing invasion at higher  
363 host temperature.

364  
365 The ease with which Ste12 can shift trait preference towards invasion – independent of Tec1 and  
366 modulated by Hsp90 and temperature – poses the question of how this shift is achieved at the

367 level of DNA binding. We show that wild-type Ste12 strongly preferred two tail-to-tail binding  
368 sites separated by three base pairs, consistent with its binding as a homodimer. The majority of  
369 homodimeric Ste12 sites in the *S. cerevisiae* genome are organized in this way, containing a  
370 perfect site paired with a site carrying one or more mismatches.

371  
372 Hyperinvasive Ste12 variants also bound to dimeric sequences, but while one was a perfect or  
373 near-perfect Ste12 site, the other was highly degenerate. Addition of Tec1 did not yield  
374 cooperative binding sites, consistent with the Tec1-independence of these variant Ste12 proteins  
375 *in vivo*. Since many invasion genes contain perfect or near-perfect Ste12 binding sites adjacent to  
376 highly degenerate ones, the binding preference of the hyperinvasive variants provides an  
377 explanation for how they can enact the invasion program in the absence of Tec1. However, the  
378 same variants failed to activate expression of mating genes, which tend to contain two nearly  
379 perfect sites, as well as the wild-type Ste12 protein did.

380  
381 We propose the following model to explain these data (Figure 6). In mating genes, two properly  
382 oriented binding sites facilitate the interaction of two Ste12 proteins. Under invasion conditions,  
383 the Ste12 dimer interface instead allows cooperative interaction between Ste12 and Tec1. We  
384 posit that mutations in Ste12 that lead to hyperinvasiveness change this interface such that the  
385 spatial conformation of the homodimer is altered and interaction with Tec1 is not possible. In  
386 this altered conformation, the Ste12 proteins, unable to make a proper symmetric contact, lose  
387 their preference for the perfect/near-perfect homodimeric binding sites. However, the altered  
388 conformation confers the ability for Ste12 to recognize a much more degenerate version of the  
389 binding site adjacent to a near-perfect site; likely neither site is bound as tightly as the wild-type  
390 Ste12 protein binds to canonical sites. The proposal of an altered Ste12 protein conformation is  
391 supported by the finding of temperature- and Hsp90-dependent variants in the Ste12 region that  
392 mediates the shift towards invasion.

393  
394 Mutations in transcription factors that generate alternative DNA-binding modes have been  
395 previously identified. For example, rare coding variants in the homeodomain recognition helices  
396 of several transcription factors alter DNA-binding specificity (40), which likely contributes to  
397 associated diseases. As we found with the Ste12 variants, these homeodomain variants bind at  
398 sites not dramatically different from the wild-type sites, yet their promiscuity is associated with  
399 diseases. Expanding beyond these studies, we demonstrate here that Ste12 can explore  
400 alternative binding modes through both mutation and environmental stress, and thereby shift  
401 preference between two ordinarily mutually exclusive traits. This surprising malleability of  
402 transcription factor binding stands in stark contrast to the fact that sequences of transcription  
403 factors tend to be highly conserved. Indeed, throughout fungal evolution, the Ste12 DNA-  
404 binding domain remains largely invariant, with Ste12 taking advantage of both multiple  
405 interacting partners that have been gained and lost over time, as well as environmental conditions  
406 such as temperature, to influence decision-making. This study, together with those revealing only  
407 weak purifying selection in functional regulatory regions, poses the challenge of reconciling  
408 flexible transcription factor activity and often highly variable regulatory regions with the  
409 longstanding observation that gene expression patterns are robust to most perturbations and  
410 conserved throughout evolution.

411  
412

413

## 414 **Materials and Methods**

415 **HT-SELEX.** We expressed and purified fragments of STE12 (1-215) and TEC(1 1-250) cloned  
416 into pGEX-4T-2 vectors. These protein fragments have been used previously and are sufficient  
417 for both individual cooperative binding *in vitro*. Fragments of each protein, as well as protein  
418 variants, were purified using a GST tag and subsequently used for HT-SELEX. SELEX reactions  
419 with homogenous and mixed protein populations were performed identically to previous work  
420 (1, 21). Briefly, a 50uL reaction containing purified Ste12 and Tec1 (1:25 molar ratio with  
421 DNA), 200ng non-specific competitor double-stranded nucleic acid poly (dI/dC), 100ng  
422 selection ligand (36N) was incubated in binding buffer (140 mM KCl, 5 mM NaCl, 1 mM  
423 K<sub>2</sub>HPO<sub>4</sub>, 2 mM MgSO<sub>4</sub>, 20 mM HEPES [pH 7.05], 100 μM EGTA, 1 μM ZnSO<sub>4</sub>) for 2 hours.  
424 GST Sepharose (GE) beads were then added to each reaction, incubated for 30 minutes, and  
425 unbound ligand was removed using seven buffer washes. Output reactions were amplified by  
426 PCR after each round, and these products were subsequently used to prep high-throughput  
427 sequencing libraries.

428

429 **Generation of STE12 mutant libraries.** The *STE12* locus from *Saccharomyces cerevisiae* strain  
430 BY4741, including the intergenic regions, was introduced into the yeast vector pRS415  
431 containing a *LEU2* marker (41). Degenerate DNA sequence encoding a 33 amino acid (99bp)  
432 segment of Ste12's DNA binding domain was generated by 2.5% doped oligonucleotide  
433 synthesis (Trilink Biotechnologies, San Diego, CA). Invariant 30bp sequences were designed on  
434 either side of the mutagenized fragment; these flanking sequences contained NotI and ApaI cut  
435 sites found in the coding sequence of *STE12*, and were unique in the *STE12* plasmid construct.  
436 Both fragment and plasmid were double-digested with NotI and ApaI, and the plasmid library  
437 was assembled by standard ligation. *STE12* libraries were transformed into electrocompetent *E.*  
438 *coli* (ElectroMAX DH10B, Invitrogen), and amplified overnight in selective media. Efficiency of  
439 ligation was verified by Sanger sequencing across the mutagenized region of 96 transformants  
440 (42); no assembly errors were detected, and mutant proportions reflected those expected for  
441 doped oligo synthesis at 2.5%. Plasmid libraries were used to transform yeast (BY4741 MAT $\alpha$  or  
442  $\Sigma$ 1278b- $\alpha$ ) with a deleted endogenous copy of *STE12* by high-efficiency lithium acetate  
443 transformation (43). The same plasmid library was used to transform yeast ( $\Sigma$ 1278b- $\alpha$ ) for  
444 invasion selection. Individual point mutations were generated in wild-type *STE12* plasmids by  
445 site-directed mutagenesis (Q5, New England Biolabs).

446

447 **Large-scale trait selections.** The BY4742 MAT $\alpha$  strain was used as the mating partner for the  
448 library-transformed BY4741 MAT $\alpha$  in all selections and mating assays. Transformed yeast cells  
449 were grown to late log-phase in a single 500mL culture, and cells were harvested to determine  
450 plasmid variant frequencies in the input population. The same culture was used to seed 36  
451 independent mating selections for each treatment: one million MAT $\alpha$  cells with *STE12* variants  
452 were mixed with 10-fold excess wild-type MAT $\alpha$  cells and allowed 5 hours to mate(44).  
453 Depending on treatment type, cell mixtures were left at 30C with DMSO, 30°C with the Hsp90  
454 inhibitor radicicol, or 37°C with DMSO. A 5uM concentration of the Hsp90 inhibitor radicicol  
455 (Sigma-Aldrich, R2146) was chosen due to its measureable effect on mating efficiency and lack  
456 of pleiotropic growth defects. Radicicol was chosen over the Hsp90 inhibitor geldanamycin  
457 (Sigma-Aldrich, G3381), because five-fold higher concentrations of geldanamycin were required  
458 to achieve the same phenotypic effect as with radicicol (data not shown). The temperature of

459 37°C was chosen for the similarity of effects on mating between temperature and radicalol  
460 treatments. After mating was completed, cell mixtures were plated using auxotrophic markers  
461 present only in mated diploids. Plasmids containing *STE12* variants were extracted from this  
462 output population, as well as from the pre-mating input, for subsequent deep sequencing. Mating  
463 selections were repeated in triplicate. For invasion,  $\Sigma$ 1278b-*a* yeast cells transformed with the  
464 *Ste12* plasmid library were grown to late log-phase in a single 500mL culture, diluted (10,000  
465 cells per plate), and plated onto 40 plates of synthetic complete medium lacking leucine (2%  
466 agar). Plates were incubated at 30°C or 37°C for 72 hours to allow for sufficient invasion, as  
467 previously described (30). After three days, cells were washed from the plate surfaces, enriching  
468 for cells embedded in the agar. Agar pucks were removed from plates with a razor. Using the  
469 “salsa” blender setting (Hamilton Beach, Glen Allen, VA), a coarse slurry was generated and  
470 subsequently poured over a vacuum apparatus lined with cheesecloth. The resulting liquid cell  
471 suspension was spun down at 5000rpm to collect cells for subsequent deep sequencing.  
472 Individual invasion assays (as in Fig. 5A) were treated identically, but 10uL aliquots of OD-  
473 normalized cultures were plated to image colonies for each strain. For high osmolarity growth,  
474 selections were conducted using the BY4741 MATa library-transformed population grown  
475 overnight in media containing 1.5M Sorbitol, as described previously (45). Populations were  
476 sequenced before and after growth to determine enrichment scores that defined the 95%  
477 confidence interval used in Fig. 3C. For all trait selections, we chose sample sizes that were at  
478 least 10-fold higher than the variant library size, ensuring that each variant would be adequately  
479 sampled in each of the three biological replicate selections.

480  
481 **Sequencing and determination of trait scores.** Sequencing was completed on Illumina’s  
482 MiSeq or NextSeq platforms. Sequencing libraries were prepared by extracting plasmids from  
483 yeast populations (Yeast Plasmid Miniprep II, Zymo Research, Irvine, CA) before and after  
484 selection. These plasmids were used as template for PCR amplification that added adaptor  
485 sequences and 8bp sample indexes to the 99bp mutagenized region for sequencing (all libraries  
486 amplified < 15 cycles). Paired-end reads spanning the mutagenized region were filtered to obtain  
487 a median of 5 million reads per sample. Using ENRICH software (46), read counts for each  
488 variant before and after selection were used to determine mating efficiency and invasion ability  
489 of *STE12* variants. Briefly, counts for a particular variant in the input and output libraries were  
490 normalized by their respective read totals to determine frequency in each, and a ratio of the  
491 output and input frequencies determine a variant’s functional score. Finally, enrichment scores  
492 are normalized by the enrichment of wild-type *Ste12* in each selection. Treatment scores are  
493 calculated identically, and in all cases where difference scores are shown, the score represents  
494  $\log_2(\text{treated}) - \log_2(\text{untreated})$ .

495  
496 **Calculating intramolecular epistasis scores.** Intramolecular epistasis scores were defined as  
497 the deviation of double-mutant’s functional score ( $W_{ij}$ ) from the multiplied scores of its  
498 constituent single-mutants ( $w_i * w_j$ ). A negative epistasis score indicates that the deleterious effect  
499 of one mutation is increased by the presence of the partner mutation, while a positive epistasis  
500 score indicates that the partner mutation decreases the deleterious effects of individual  
501 mutations(47).

502  
503 **Quantitative mating assay.** Individual variants tested for mating efficiency were treated  
504 identically to the large-scale mating selection experiments, except genotypes were scored



505 individually on selective plates for either mated diploids (2N) or both diploids and unmated  
506 MATa haploids (2N, 1N). The proportion of mated individuals (mating efficiency) is taken as the  
507 ratio of colony counts on diploid to counts on diploid + haploid plates (2N/2N1N). Ste12  
508 variants were always tested alongside wild-type to determine relative changes in response to  
509 treatment.

510  
511 **STE12 variant RNA-seq.** RNA was extracted from yeast cells harboring the *STE12* mutant  
512 library grown under non selective conditions using acid phenol extraction as previously  
513 described(48). *STE12*-specific cDNA was created using a gene-specific cDNA primer and  
514 Superscript III (Life Technologies). cDNA was amplified in a manner similar to the plasmids,  
515 and prepared for sequencing using Illumina Nextseq.

516  
517 **Large-scale analysis of Ste12 binding sites *in vivo*.** A *HIS3* reporter gene was used for testing  
518 large populations of binding site variants (Fig. 5 - Suppl. Fig. 2) in media lacking histidine.  
519 Although Ste12 does bind single PREs as a monomer, two sites are needed for signal detection in  
520 reporter assays (49). We designed oligonucleotides that maintain the central portion of the native  
521 PRE, but randomized six surrounding bases on either side  
522 (NNNNNTTTCAAATGAAANNNNN). This library was cloned into a promoter from the  
523 same plasmid used in the luciferase assay, at the same position as the native PRE. Strains  
524 containing one of four Ste12 protein variants were transformed with the same binding site library  
525 reporter population, and grown overnight in synthetic media lacking histidine with 10mM of the  
526 His3 competitive inhibitor 3-amino-triazole. Three biological replicate selections were conducted  
527 for each Ste12 protein variant tested against the binding site library. Cells were collected and  
528 sequenced before and after selections to determine enrichment scores for each binding site  
529 variant. Computational analysis of binding site enrichment scores was identical to pipeline for  
530 STE12 protein variants. Enrichment of all binding site variants are shown relative to the  
531 enrichments of empty plasmids, which were spiked-in to the binding site library as control. The  
532 250 binding sites with the highest enrichments were grouped and Weblogo (50) was used to  
533 generate base preference plots.

534  
535 **Evolutionary analysis of Ste12 DNA-binding domain among fungi.** Using fungal genomes  
536 deposited into NCBI and from the fungal sequencing project at Joint Genome Institute, we  
537 created a BLAST database of translated coding sequences and queried with the *S. cerevisiae*  
538 Ste12 protein sequence. Full protein sequences from BLAST hits were aligned using MUSCLE  
539 (51) and used to determine conservation at each site in the mutated segment. The secondary  
540 structure of *S. cerevisiae*'s Ste12 DNA-binding domain was determined using Psipred (52).

541  
542 **Analysis of Ste12 ChIP data.** Genes bound by Ste12 only in mating conditions were compared  
543 to those bound by Ste12 only in invasion conditions (14). FIMO(53) was used to extract all  
544 matches to the Ste12 binding site in each of these gene sets. The frequency of the each possible  
545 base at position 6 of the core STE12 motif was determined relative to the genomic background  
546 (STE12 binding sites in all upstream sequences, no separation by mating or invasion gene  
547 function). The core 6 base frequencies relative to genomic background was then compared for  
548 genes bound in mating or invasion conditions. We used the same method to look at core 6 base  
549 frequencies at genes bound by both Ste12 and Tec1 or those bound by Ste12 alone during  
550 invasion.



551  
552  
553  
554  
555  
556  
557  
558  
559  
560  
561  
562  
563  
564  
565  
566  
567  
568  
569  
570  
571  
572  
573  
574  
575  
576  
577  
578  
579  
580  
581  
582  
583  
584  
585  
586  
587  
588  
589  
590  
591  
592  
593  
594  
595  
596

## References:

1. A. Jolma *et al.*, DNA-dependent formation of transcription factor pairs alters their binding specificity. *Nature*. **527**, 384–388 (2015).
2. D. R. Boer *et al.*, Structural basis for DNA binding specificity by the auxin-dependent ARF transcription factors. *Cell*. **156**, 577–89 (2014).
3. N. Hentze, L. Le Breton, J. Wiesner, G. Kempf, M. P. Mayer, Molecular mechanism of thermosensory function of human heat shock transcription factor Hsf1. *Elife*. **5**, 1–24 (2016).
4. A. Mody, J. Weiner, S. Ramanathan, Modularity of MAP kinases allows deformation of their signalling pathways. *Nat. Cell Biol.* **11**, 484–91 (2009).
5. J. G. Cook, L. Bardwell, J. Thorner, Inhibitory and activating functions for MAPK Kss1 in the *S. cerevisiae* filamentous-growth signalling pathway. *Nature*. **390**, 85–88 (1997).
6. S. Beyhan, M. Gutierrez, M. Voorhies, A. Sil, A Temperature-Responsive Network Links Cell Shape and Virulence Traits in a Primary Fungal Pathogen. *PLoS Biol.* **11** (2013), doi:10.1371/journal.pbio.1001614.
7. J. R. Perfect, *Cryptococcus neoformans*: The yeast that likes it hot. *FEMS Yeast Res.* **6**, 463–468 (2006).
8. H. D. Madhani, G. R. Fink, The control of filamentous differentiation and virulence in fungi. *Trends Cell Biol.* **8**, 348–353 (1998).
9. J. F. Louvion, T. Abbas-Terki, D. Picard, Hsp90 is required for pheromone signaling in yeast. *Mol. Biol. Cell.* **9**, 3071–83 (1998).
10. J. G. Zalatan, S. M. Coyle, S. Rajan, S. S. Sidhu, W. a Lim, Conformational control of the Ste5 scaffold protein insulates against MAP kinase misactivation. *Science*. **337**, 1218–22 (2012).
11. J. W. Dolan, C. Kirkman, S. Fields, The yeast STE12 protein binds to the DNA sequence mediating pheromone induction. *Proc. Natl. Acad. Sci. U. S. A.* **86**, 5703–7 (1989).
12. B. Errede, G. Ammerer, STE12, a protein involved in cell-type-specific transcription and signal transduction in yeast, is part of protein-DNA complexes. *Genes Dev.* **3**, 1349–1361 (1989).
13. Y. L. O. Yuan, I. L. Stroke, S. Fields, Coupling of cell identity to signal response in yeast: Interaction between the alpha and STE12 proteins. *Genes Dev.* **7**, 1584–1597 (1993).
14. J. Zeitlinger *et al.*, Program-specific distribution of a transcription factor dependent on partner transcription factor and MAPK signaling. *Cell*. **113**, 395–404 (2003).
15. S. Chou, S. Lane, H. Liu, Regulation of mating and filamentation genes by two distinct Ste12 complexes in *Saccharomyces cerevisiae*. *Mol. Cell. Biol.* **26**, 4794–805 (2006).
16. H. Dong, W. Courchesne, A novel quantitative mating assay for the fungal pathogen *Cryptococcus neoformans* provides insight into signalling pathways responding to nutrients and temperature. *Microbiology*. **144** ( Pt 6), 1691–7 (1998).
17. J. Wong Sak Hoi, B. Dumas, Ste12 and Ste12-like proteins, fungal transcription factors regulating development and pathogenicity. *Eukaryot. Cell.* **9**, 480–5 (2010).
18. H. D. Madhani, Combinatorial Control Required for the Specificity of Yeast MAPK Signaling. *Science (80-. )*. **275**, 1314–1317 (1997).
19. V. M. Boer, J. H. De Winde, J. T. Pronk, M. D. W. Piper, The genome-wide transcriptional responses of *Saccharomyces cerevisiae* grown on glucose in aerobic

- 597 chemostat cultures limited for carbon, nitrogen, phosphorus, or sulfur. *J. Biol. Chem.* **278**,  
598 3265–3274 (2003).
- 599 20. S. Prinz *et al.*, Control of yeast filamentous-form growth by modules in an integrated  
600 molecular network. *Genome Res.* **14**, 380–390 (2004).
- 601 21. A. Jolma *et al.*, Multiplexed massively parallel SELEX for characterization of human  
602 transcription factor binding specificities. *Genome Res.*, 861–873 (2010).
- 603 22. A. Jolma *et al.*, DNA-Binding Specificities of Human Transcription Factors. *Cell.* **152**,  
604 327–339 (2013).
- 605 23. R. Gordan *et al.*, Curated collection of yeast transcription factor DNA binding specificity  
606 data reveals novel structural and gene regulatory insights. *Genome Biol.* **12**, R125 (2011).
- 607 24. Y. L. Yuan, S. Fields, Properties of the DNA-binding domain of the *Saccharomyces*  
608 *cerevisiae* STE12 protein. *Mol. Cell. Biol.* **11**, 5910–8 (1991).
- 609 25. C. J. Roberts *et al.*, Signaling and Circuitry of Multiple MAPK Pathways Revealed by a  
610 Matrix of Global Gene Expression Profiles. **287**, 873–881 (2000).
- 611 26. B. Heise *et al.*, The TEA transcription factor Tec1 confers promoter-specific gene  
612 regulation by Ste12-dependent and -independent mechanisms. *Eukaryot. Cell.* **9**, 514–531  
613 (2010).
- 614 27. K. A. Olson *et al.*, Two Regulators of Ste12p Inhibit Pheromone-Responsive  
615 Transcription by Separate Mechanisms Two Regulators of Ste12p Inhibit Pheromone-  
616 Responsive Transcription by Separate Mechanisms. *Mol. Cell. Biol.* (2000),  
617 doi:10.1128/MCB.20.12.4199-4209.2000.Updated.
- 618 28. D. M. Fowler, S. Fields, Deep mutational scanning: A new style of protein science. *Nat.*  
619 *Methods.* **11**, 801–807 (2014).
- 620 29. E. a. Winzeler, Functional Characterization of the *S. cerevisiae* Genome by Gene Deletion  
621 and Parallel Analysis. *Science (80-. )*. **285**, 901–906 (1999).
- 622 30. O. Ryan *et al.*, Global gene deletion analysis exploring yeast filamentous growth. *Science.*  
623 **337**, 1353–6 (2012).
- 624 31. O. Shoval, Evolutionary Trade-Offs, Pareto Optimality, and the Geometry of Phenotype  
625 Space. *Science (80-. )*. **1157** (2012), doi:10.1126/science.1217405.
- 626 32. S. K. Jones, R. J. Bennett, Fungal mating pheromones: choreographing the dating game.  
627 *Fungal Genet. Biol.* **48**, 668–76 (2011).
- 628 33. J. a Fraser *et al.*, Same-sex mating and the origin of the Vancouver Island *Cryptococcus*  
629 *gattii* outbreak. *Nature.* **437**, 1360–1364 (2005).
- 630 34. T. a Sangster, S. Lindquist, C. Queitsch, Under cover: causes, effects and implications of  
631 Hsp90-mediated genetic capacitance. *Bioessays.* **26**, 348–62 (2004).
- 632 35. D. F. Jarosz, M. Taipale, S. Lindquist, Protein Homeostasis and the Phenotypic  
633 Manifestation of Genetic Diversity: Principles and Mechanisms. *Annu. Rev. Genet.* **44**,  
634 189–216 (2010).
- 635 36. D. F. Jarosz, S. Lindquist, Hsp90 and environmental stress transform the adaptive value of  
636 natural genetic variation. *Science.* **330**, 1820–4 (2010).
- 637 37. T. a Sangster *et al.*, HSP90 affects the expression of genetic variation and developmental  
638 stability in quantitative traits. *Proc. Natl. Acad. Sci. U. S. A.* **105**, 2963–2968 (2008).
- 639 38. G. I. Karras *et al.*, HSP90 Shapes the Consequences of Human Genetic Variation. *Cell.*  
640 **168**, 856–866.e12 (2017).
- 641 39. N. Sahni *et al.*, Widespread Macromolecular Interaction Perturbations in Human Genetic  
642 Disorders. *Cell.* **161**, 647–660 (2015).

- 643 40. L. A. Barrera *et al.*, Survey of variation in human transcription factors reveals prevalent  
644 DNA binding changes. *Science* (80-. ). **351**, 1450–1454 (2016).
- 645 41. D. Mumberg, R. Müller, M. Funk, Yeast vectors for the controlled expression of  
646 heterologous proteins in different genetic backgrounds. *Gene*. **156**, 119–22 (1995).
- 647 42. F. Sanger, S. Nicklen, a R. Coulson, DNA sequencing with chain-terminating inhibitors.  
648 *Proc. Natl. Acad. Sci. U. S. A.* **74**, 5463–7 (1977).
- 649 43. R. D. Gietz, R. a Woods, Transformation of yeast by lithium acetate/single-stranded  
650 carrier DNA/polyethylene glycol method. *Methods Enzymol.* **350**, 87–96 (2002).
- 651 44. J.-Y. Leu, A. W. Murray, Experimental evolution of mating discrimination in budding  
652 yeast. *Curr. Biol.* **16**, 280–6 (2006).
- 653 45. F. Posas, E. a Witten, H. Saito, Requirement of STE50 for osmostress-induced activation  
654 of the STE11 mitogen-activated protein kinase kinase kinase in the high-osmolarity  
655 glycerol response pathway. *Mol. Cell. Biol.* **18**, 5788–5796 (1998).
- 656 46. A. F. Rubin *et al.*, Enrich2: a statistical framework for analyzing deep mutational scanning  
657 data (2016), doi:10.1101/075150.
- 658 47. C. L. Araya *et al.*, A fundamental protein property, thermodynamic stability, revealed  
659 solely from large-scale measurements of protein function. *Proc. Natl. Acad. Sci. U. S. A.*  
660 **109**, 16858–63 (2012).
- 661 48. J. Cuperus, R. Lo, L. Shumaker, J. Proctor, S. Fields, A tetO Toolkit To Alter Expression  
662 of Genes in *Saccharomyces cerevisiae*. *ACS Synth. Biol.* **4**, 842–852 (2015).
- 663 49. T. C. Su, E. Tamarkina, I. Sadowski, Organizational constraints on Ste12 cis-elements for  
664 a pheromone response in *Saccharomyces cerevisiae*. *FEBS J.* **277**, 3235–3248 (2010).
- 665 50. G. Crooks, G. Hon, J. Chandonia, S. Brenner, NCBI GenBank FTP Site\nWebLogo: a  
666 sequence logo generator. *Genome Res.* **14**, 1188–1190 (2004).
- 667 51. R. C. Edgar, MUSCLE: Multiple sequence alignment with high accuracy and high  
668 throughput. *Nucleic Acids Res.* **32**, 1792–1797 (2004).
- 669 52. Liam J. McGuffin, K. Bryson, D. T. Jones, The PSIPRED protein structure prediction  
670 server. *Bioinformatics.* **16**, 404–405 (2000).
- 671 53. C. E. Grant, T. L. Bailey, W. S. Noble, FIMO: Scanning for occurrences of a given motif.  
672 *Bioinformatics.* **27**, 1017–1018 (2011).

673  
674 **Acknowledgments:** We thank J. Thomas for advice on analysis of fungal variation. We thank D.  
675 Fowler and H. Malik for comments on the manuscript. The work was supported by NIH grant  
676 R01GM114166 to C.Q. and S.F. M.W.D. was supported by an NSF Graduate Research  
677 Fellowship and a WRF-Hall fellowship. S.F. is an investigator of the Howard Hughes Medical  
678 Institute, which supported J.T.C.

679  
680 **Author Contributions:** M.W.D., J.T.C., S.F., and C.Q. conceived and interpreted experiments.  
681 M.W.D., S.F., and C.Q. wrote the manuscript, J.T.C. and J.A.C. provided comments. M.W.D.  
682 conducted experiments and data analysis; J.A.C. contributed to high-throughput binding assay.

683  
684 **Data Availability.** High-throughput sequencing reads have been submitted to NCBI SRA,  
685 awaiting accession number. Datasets with calculated enrichment scores for each tested variant in  
686 each condition, along with positional mean scores, and scores from binding site library selections  
687 are provided in source data files.

688

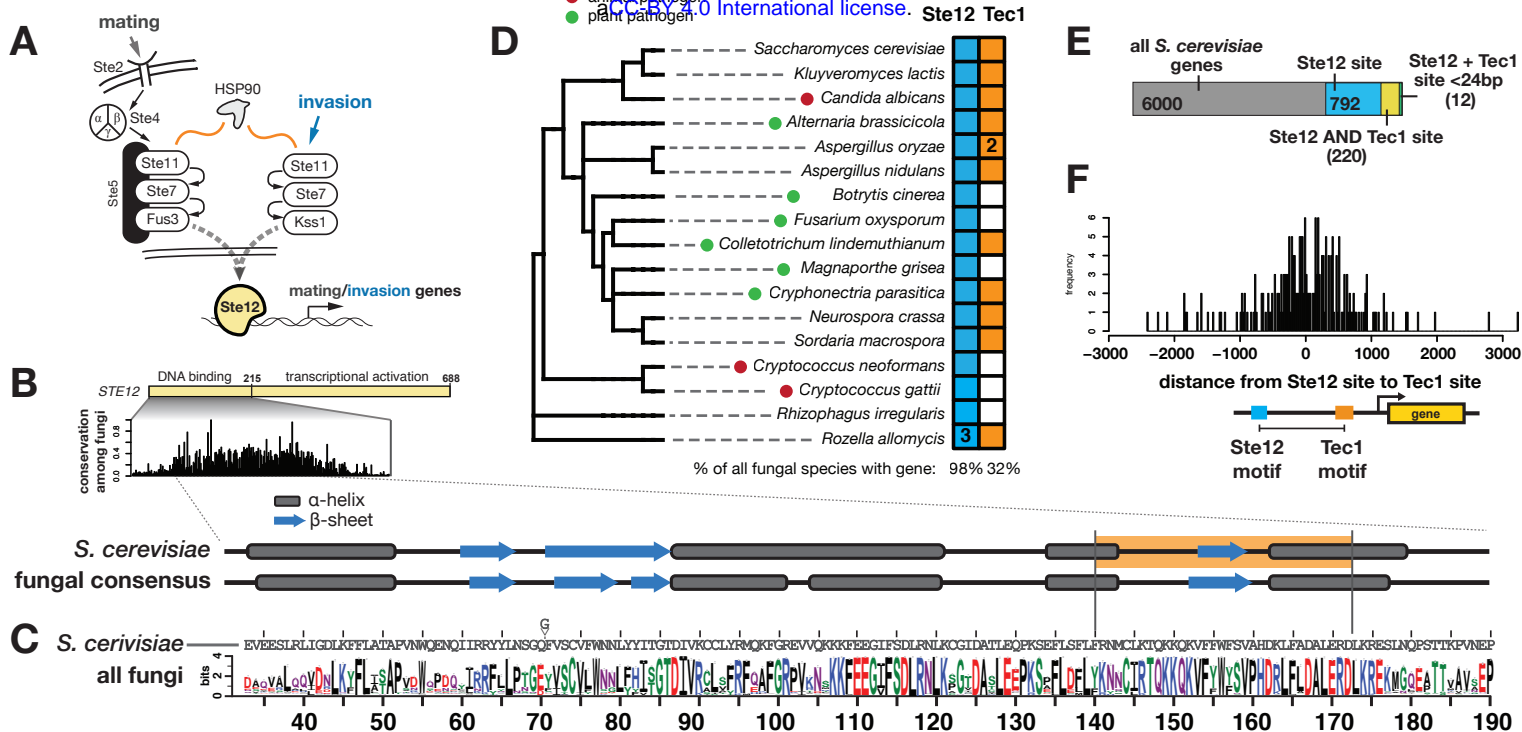

**Figure 1. Conservation of Ste12 and Tec1 and their DNA-binding sites.** (A) The yeast mating and invasion pathways contain shared signaling components, and both depend on Ste12 for activation of distinct regulatory programs. (B) *S. cerevisiae* Ste12 protein has a non-conserved transcriptional activation domain, as well as a highly conserved DNA-binding domain. The secondary structure of this domain is predicted to contain a pattern of alpha-helices (grey boxes) interspersed with beta-sheets (blue arrows) that are conserved among all fungal species. The region of the DNA-binding domain chosen for mutagenesis is shaded in orange. (C) A logo plot of the conserved portion of Ste12's DNA-binding domain generated from 1229 fungal species. (D) A phylogeny of fungal species selected for those with functionally tested *STE12* genes (except for the basal fungi *R. irregularis* and *R. allomycis* shown as outgroups). Pathogenic species are indicated with circles, and colored according to plant (green) or animal (red) hosts. All fungal species were queried for presence of a *STE12* (blue) or *TEC1* (orange) gene, and filled squares indicate presence of either gene, numbers inside boxes indicate species with multiple gene copies. Results for all species are shown below each gene's column. (E) Proportional bar chart showing the number of *S. cerevisiae* genes that contain Ste12 sites (blue), Tec1 and Ste12 sites (yellow), and adjacent sites less than 24 bases from each other (green). (F) Histogram showing frequencies of spacing between all Ste12 and Tec1 binding sites in the *S. cerevisiae* genome. Negative values indicate the Tec1 site is 5' of the Ste12 site, and positive values the converse.

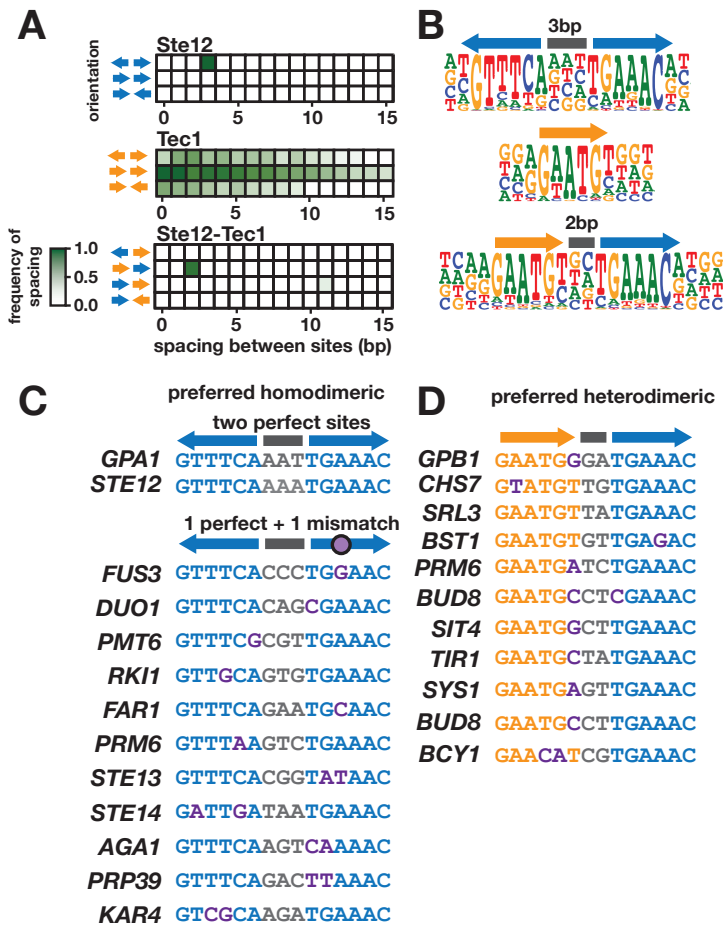

**Figure 2. Identification of the DNA-binding preferences of Ste12 and Tec1 by HT-SELEX.** (A) Heatmap showing relative frequencies of the possible orientations and spacings of the primary 6-mer selected in Ste12 (TGAAAC, upper) and Tec1 (GAATGT, middle) binding reactions. The bottom heatmap shows the frequency of each respective 6-mer in the co-binding sample containing both proteins. The single dark green box in the upper and bottom heatmaps indicates the most frequent orientation and spacing of sites; white boxes are at most 30% as frequent as the maximum. No frequent dimeric site organizations were observed for Tec1 (middle heat map). (B) Full motifs identified by Autoseed software (1). (C) Instances of the Ste12 homodimeric tail-to-tail, 3 base-pair spaced motif were used to query native yeast promoters. Two pheromone-induced genes, *GPA1* and *STE12*, contain two perfect sites, while most other genes contain a perfect site paired with a site containing one or two mismatches, with the 3 base-pair spacing intact. (D) A similar search of yeast promoters using the preferred Ste12 and Tec1 heterodimeric site identified a set of invasion-associated genes, as well as those not previously linked to invasion.



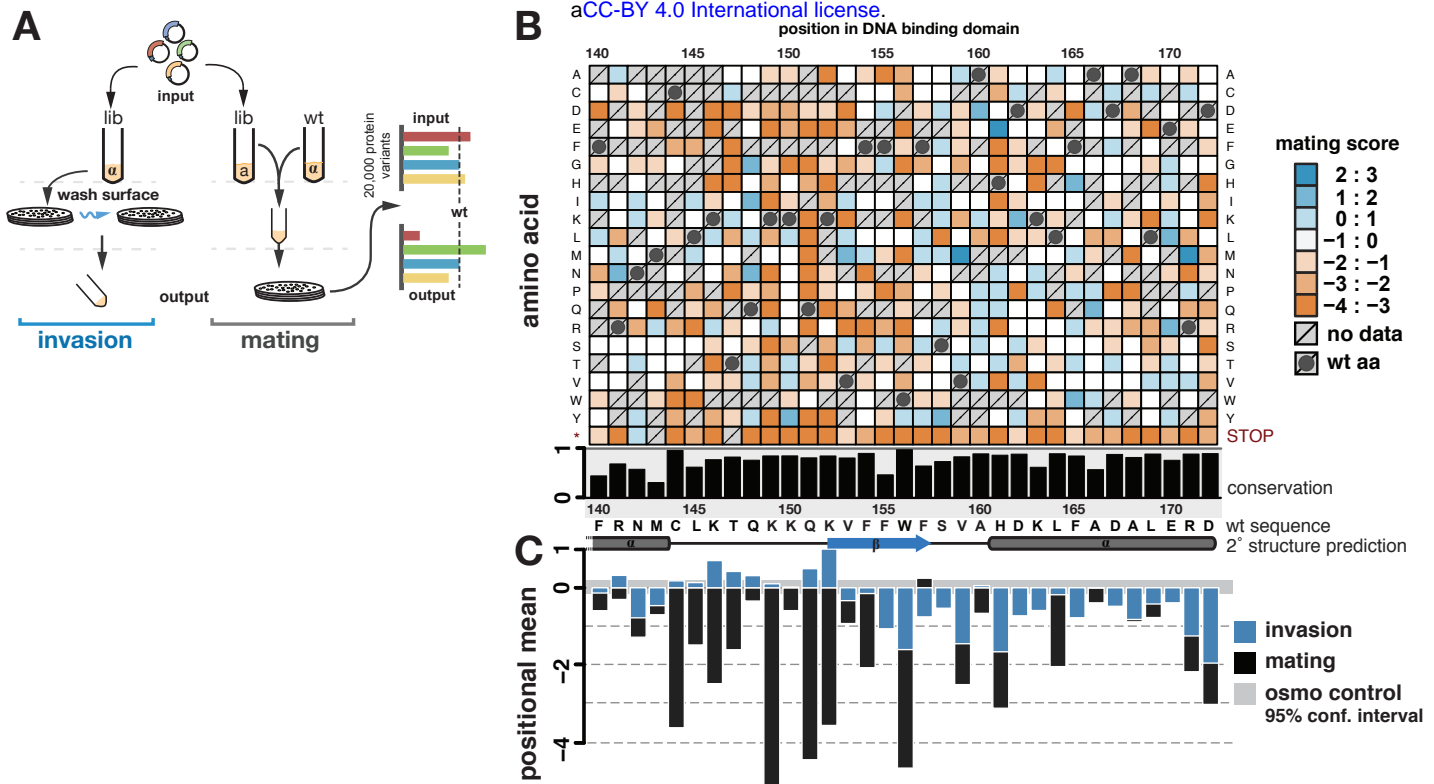

**Figure 3. Deep mutational scanning identifies Ste12 DNA-binding domain mutants with altered mating and invasion function.** (A) Two yeast populations were transformed with the same *STE12* variant library. For assaying invasion, SIGMA1278b *MAT $\alpha$*  cells ( $n = 400,000$  per replicate, 3 biological replicates) were plated on selective media, and grown. Selection was performed by washing colonies from plate surfaces and collecting cells embedded in the agar for sequencing. For assaying mating, BY4741 *MAT $\alpha$  ste12 $\Delta$*  cells were mated to *MAT $\alpha$*  cells, and diploids ( $n = 500,000$  per replicate, 3 biological replicates) were selected, scraped from the agar, and sequenced. In both cases, input variant frequencies were defined prior to selection. (B) The effects of single amino acid substitutions within Ste12's DNA-binding domain on mating ability are shown. On the x-axis, the wild-type Ste12 sequence is shown, along with its predicted secondary structure (helices shown as tubes) and conservation. Conservation was determined as fraction of identity among 1229 fungal species. On the y-axis, amino acid substitutions are shown. Variants increasing mating efficiency are in shades of blue, and variants decreasing mating efficiency are in shades of orange based on log<sub>2</sub> enrichment scores relative to wild-type. Dark grey circles indicate the wild-type Ste12 residue, and crosses indicate missing data. Ste12 variants showed comparable expression levels (Fig. 3 - Suppl. 3). (C) Positional mean scores for single amino acid substitutions are shown for mating (black) and invasion (blue), excluding stop codons. Grey horizontal bar indicates confidence interval for experimental noise determined from selection for Ste12-independent high osmolarity growth.

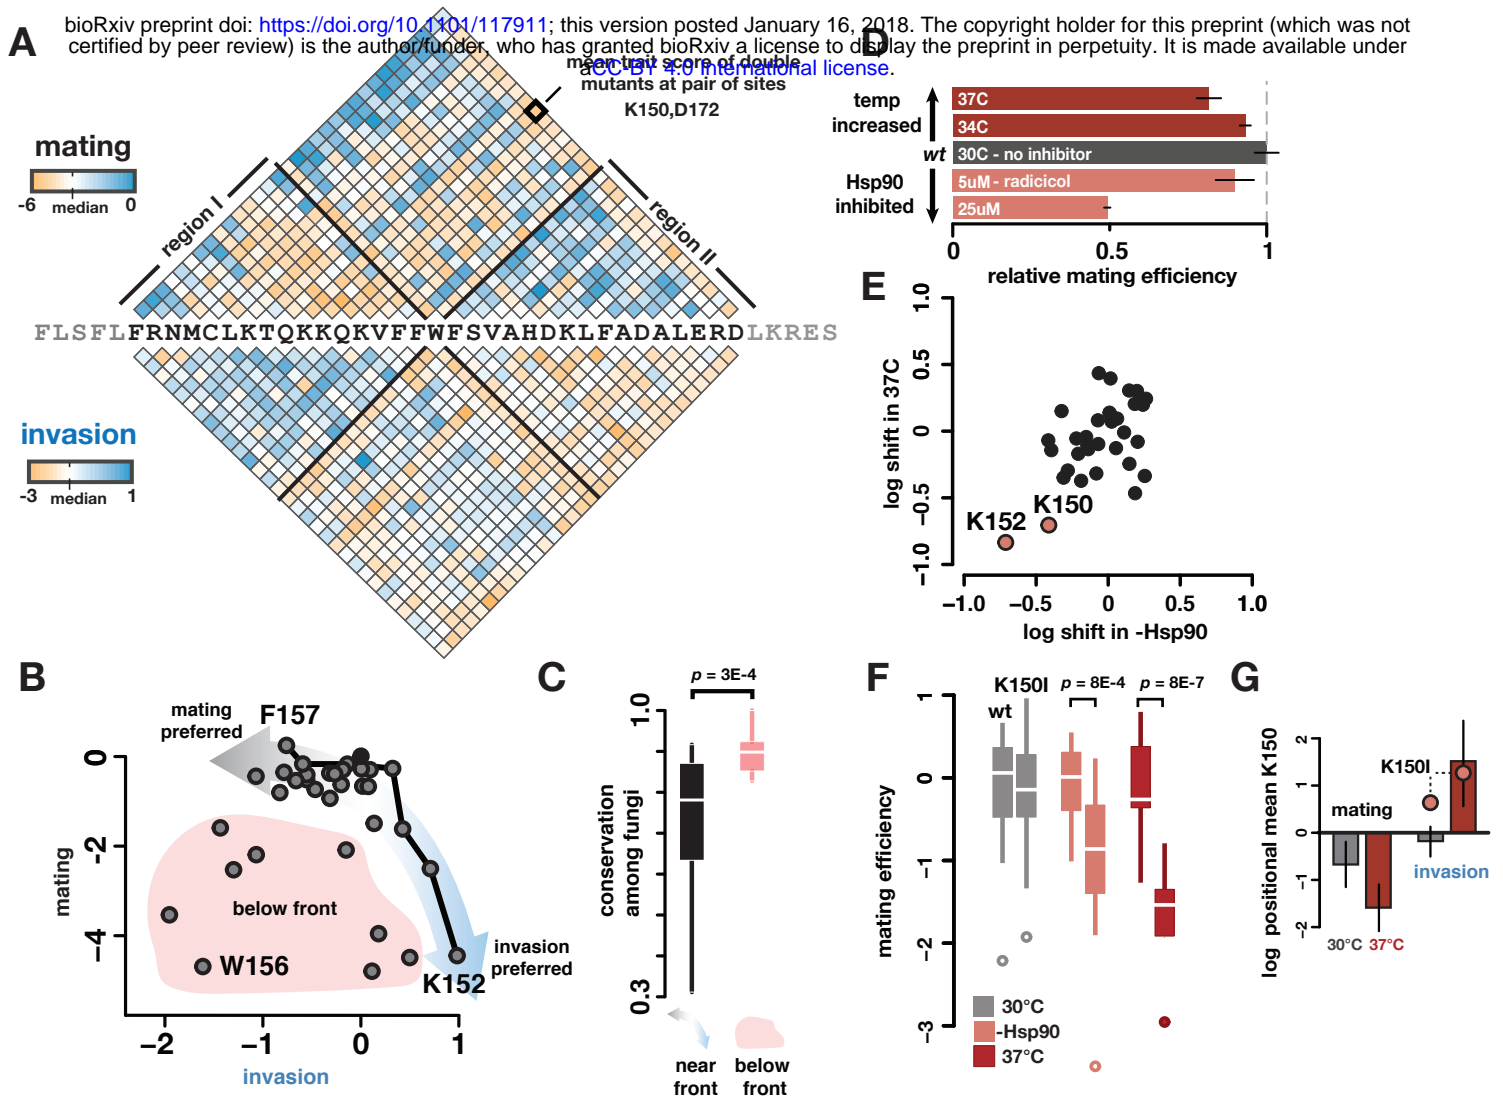

**Figure 4. Mutations residing in a region of the Ste12 DNA-binding domain increase invasion at the cost of mating, with exceptional mutations doing so in a temperature- and Hsp90-dependent manner.** (A) Mean effect of double mutations between all combinations of positions for mating (above wild-type sequence) and invasion (below wild-type sequence). A specific pair of positions is shown in bold. Effects are color-coded as in Figure 3, functional variants in shades blue, nonfunctional variants are shown in shades of orange. Note difference in scale ranges between mating and invasion. Black lines emanating from W156 represent boundaries of region I, in which mutations primarily reduced mating, and region II, in which mutations primarily reduced invasion. (B) Scatterplot of positional mean scores for both mating and invasion showed inverse relationship, indicating a tradeoff between both traits. The tradeoff is visualized as a Pareto front (black line), which was determined empirically; positions near the front maintain high values for one trait and minimize costs to the other. Arrows indicate preference for either mating (grey) or invasion (blue). Positions near the front were distinguished from those below the front (shaded in red) by calculating Euclidian distances. (C) Boxplots show conservation for positions near and below the front; positions below the front are significantly more conserved among fungi than those near the front (two-sided t-test). (D) Mating efficiency of yeast cells with wild type Ste12 at increased temperature (dark red) or in the presence of Hsp90 inhibitor radicicol (pale red) is reduced relative to an untreated control (black), error bars represent standard error of the mean (s.e.m). (E) The mating efficiency of Ste12 variants at high temperature or with Hsp90 inhibition is shown as the shift in mean effect at each mutated position. Two positions, K150 and K152 (pale red), showed greatest sensitivity to both treatments. (F) K150I was tested in a quantitative assay to validate its temperature-sensitive and Hsp90-dependent mating activity, shown relative to wild type (left boxplot in each pair) in each treatment (n = 20 for each sample). (G) Ste12 variants at K150 (mean effect) decreased mating (left panel) and invasion (right panel) at standard temperature (grey bars). At high temperature (red bars), mating further decreased; however, invasion increased. Error bars represent s.e.m. K150I variant is individually highlighted for comparison.

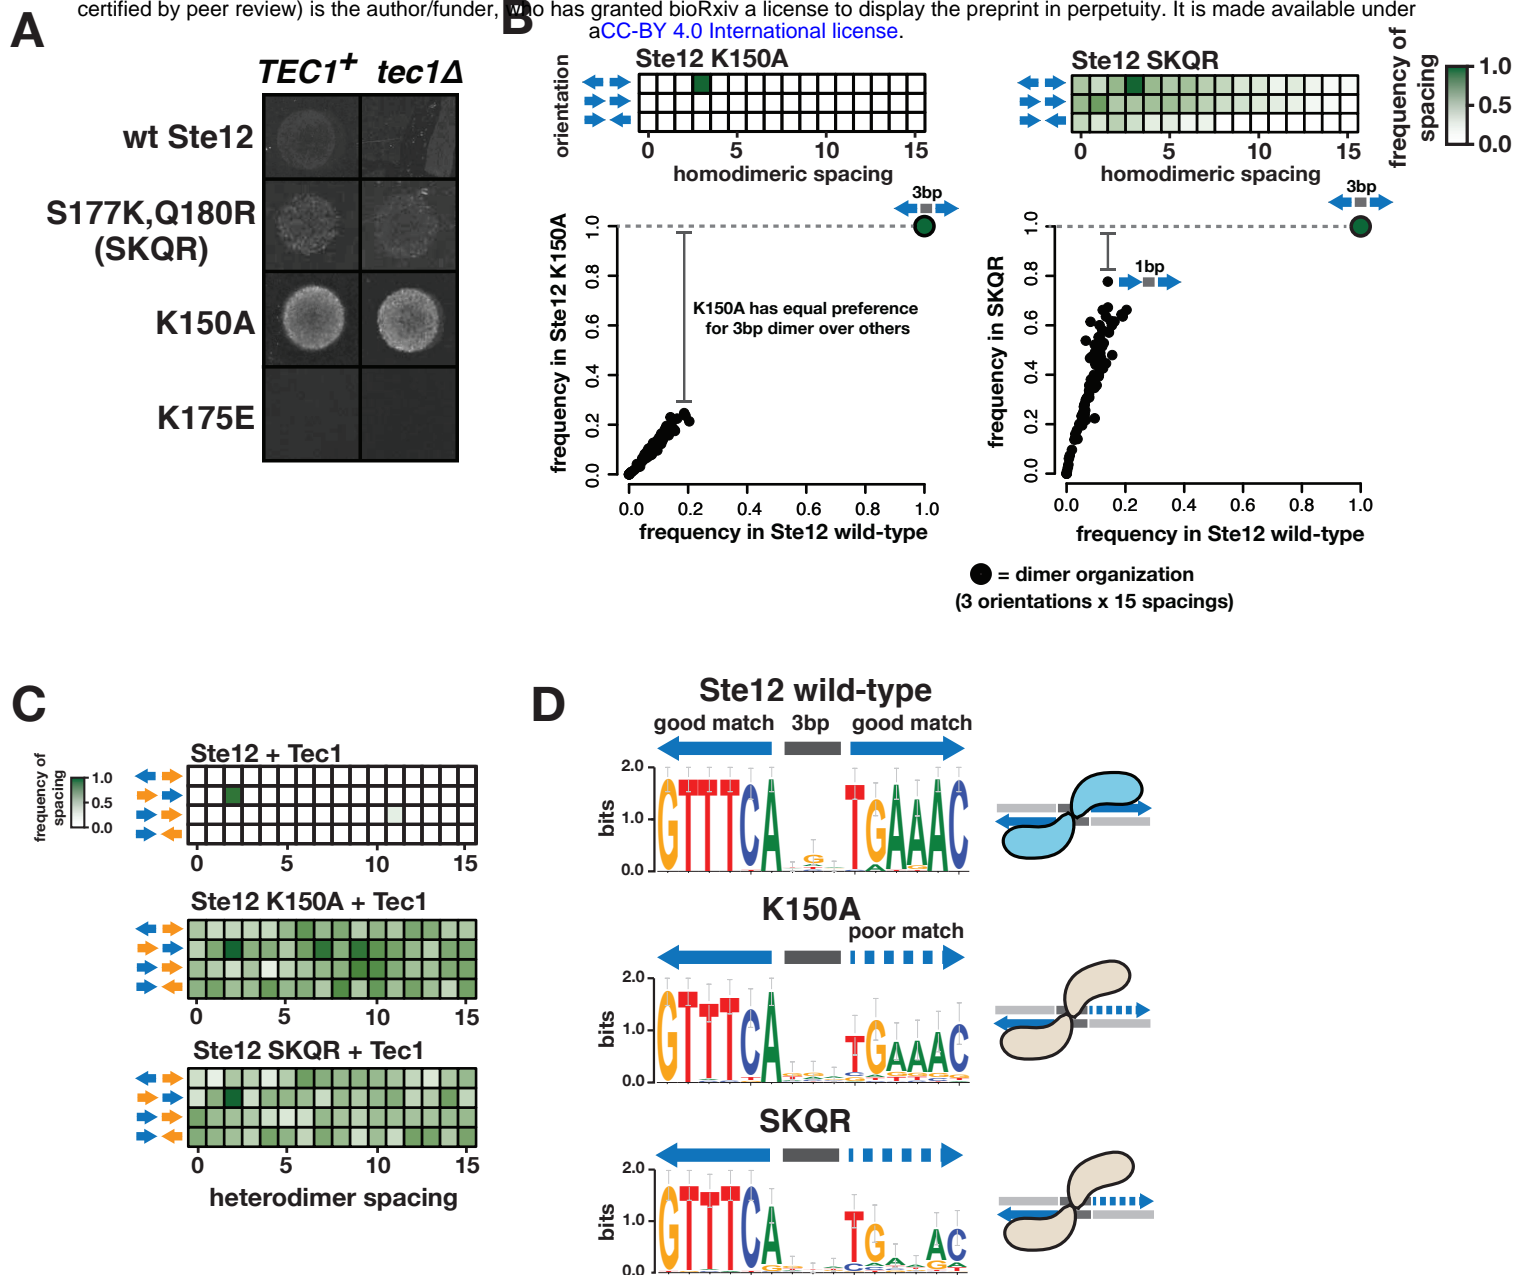

**Figure 5. Ste12 DNA-binding domain mutants that confer invasion independent of the co-factor Tec1 have altered binding specificity.** (A) Wild-type Ste12 requires the co-factor Tec1 for invasion; a *tec1Δ* strain fails to invade. The region I mutation K150A showed a hyperinvasive phenotype with or without Tec1. Introduction of the two positively charged residues found in *C. gattii* (SKQR) also led to Tec1-independent invasion, whereas introduction of a negative charge (K174E) eliminated invasion. The hyperinvasive Ste12 mutants showed a dominant invasion phenotype, as they were tested in the presence of wild-type Ste12, in the SIGMA1278b background. (B) Spacing heatmaps for Ste12's binding site are shown as in Fig. 2A. The K150A retains the same preference for tail-to-tail 3 base pair-spaced sites as the wild-type Ste12, but SKQR's preference is reduced. To visualize this difference, the scatterplots below show relative frequencies of site organizations for each variant (y-axis) compared to wild-type Ste12 (x-axis), where each point represents one orientation and spacing combination (example of SKQR's reduced preference is shown: its preference for head-to-tail, 1bp is ~78% that of the tail-to-tail 3bp site). (C) Spacing heatmaps are shown for the K150A and SKQR variants in co-binding reactions with Tec1; unlike wild-type Ste12 (repeated from Fig. 2A lower panel for clarity), neither variant shows strong preference for any heterodimeric site organization. (D) Logo plots generated from the 50 most highly enriched sequences in HT-SELEX represent ideal sites for each variant alongside wild-type Ste12.

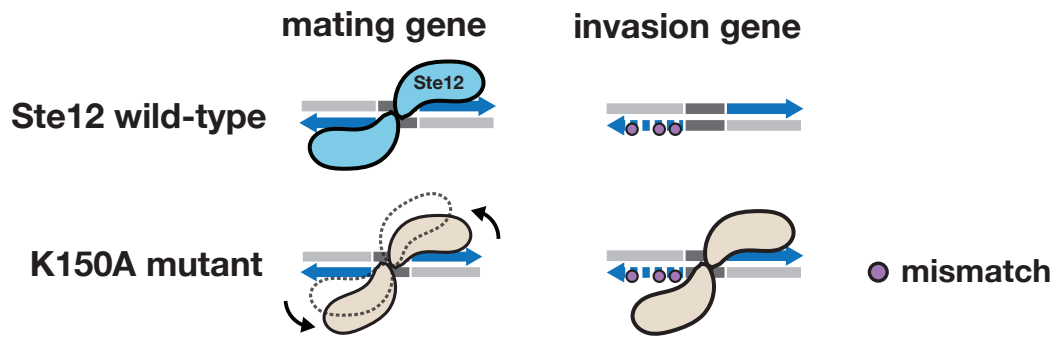

**Figure 6. A model for novel site recognition by Tec1-independent Ste12 variants.** Wild-type Ste12 protein (blue) is compared to the K150A mutant (tan) for binding at a mating gene with two perfect recognition sites (tail-to-tail with a 3 base pair spacing, shown in blue) and an invasion gene with a single perfect site along with a degenerate site. Due to its altered dimer interface, the “kinked” mutant K150A is less capable of binding symmetrically at two perfect sites, consistent with its phenotype of reduced mating efficiency. However, the conformation of K150A allows the variant protein to occupy novel sites within invasion genes that contain one perfect or nearly perfect site paired with a degenerate site; wild-type Ste12 is unable to occupy these sites.

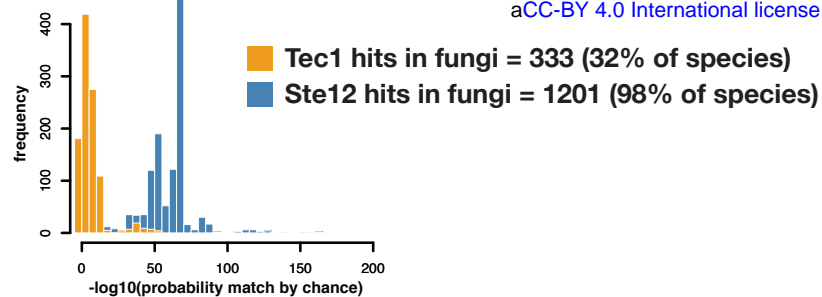

**Fig. 1 - Suppl. Fig 1. *TEC1* is frequently absent in fungi whereas *STE12* is maintained.** We queried a protein database of 1229 fungal genomes and identified matches to either *S. cerevisiae* Tec1 (orange) or Ste12 (blue) sequence.



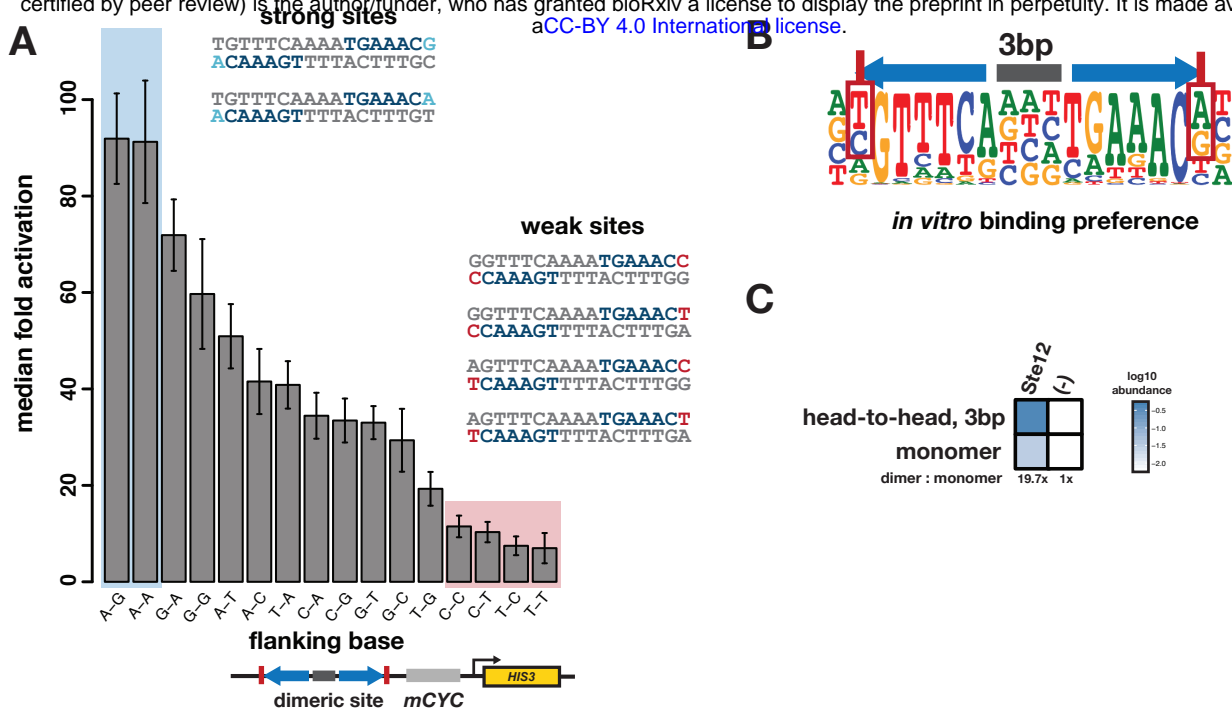

**Fig. 2 - Suppl. Fig 1. Wild-type Ste12's flanking base preferences *in vitro* are correlated with basal activity *in vivo*.** (A) We collected activity scores among all sites containing perfect dimer sites GTTTCANNNTGAAAC, separated by the combination of flanking bases following the final base of the core motif ( $n > 50$  for all flank combinations), and plotted the median activation of these sets of sites. Nearly an order of magnitude of Ste12's activation can be explained by the combination of flanking bases on a dimeric site. (B) Ste12's flanking base preferences identified *in vitro* by HT-SELEX (from Fig. 2B). (C) Ste12 was unable to activate a monomeric site *in vivo*, and this preference is reflected in its *in vitro* preference for dimeric binding.

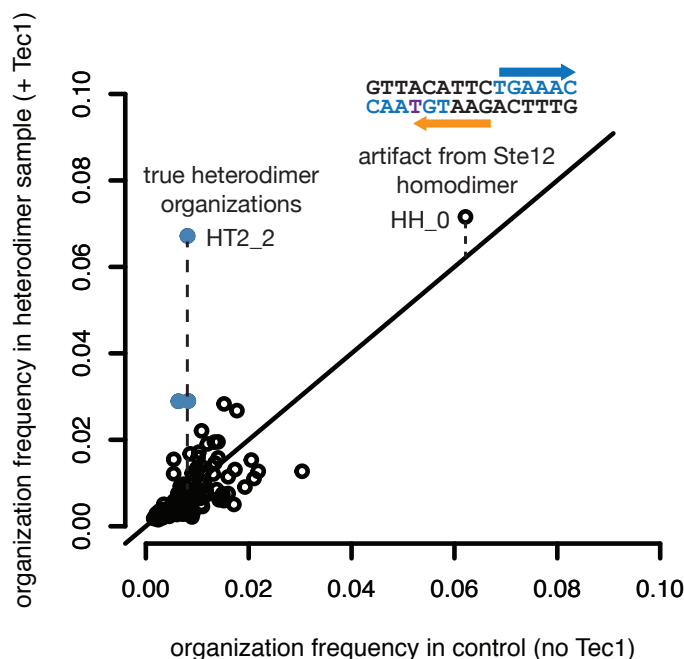

**Fig. 2 - Suppl. Fig 2. Comparing co-binding sample with Ste12 alone sample allows removal of false Tec1 sites.** Each point represents a particular spacing and orientation combination. The frequency of each combination found in output SELEX samples is shown for Ste12 alone (x-axis) and for Ste12 + Tec1 (y-axis). The most frequent organization in the Ste12 + Tec1 sample is head-to-head 0bp, but this site arises from fortuitous spacer sequences between Ste12 homodimer sites that resemble a Tec1 site (example indicated above head-to-head 0bp point). Normalizing each organization by its representation in the Ste12 alone sample reveals the true heterodimeric sites (colored in blue). (HH\_0 = head-to-head, 0bp spacer, HT2\_2 = head-to-tail Tec1 before Ste12, 2bp spacer)

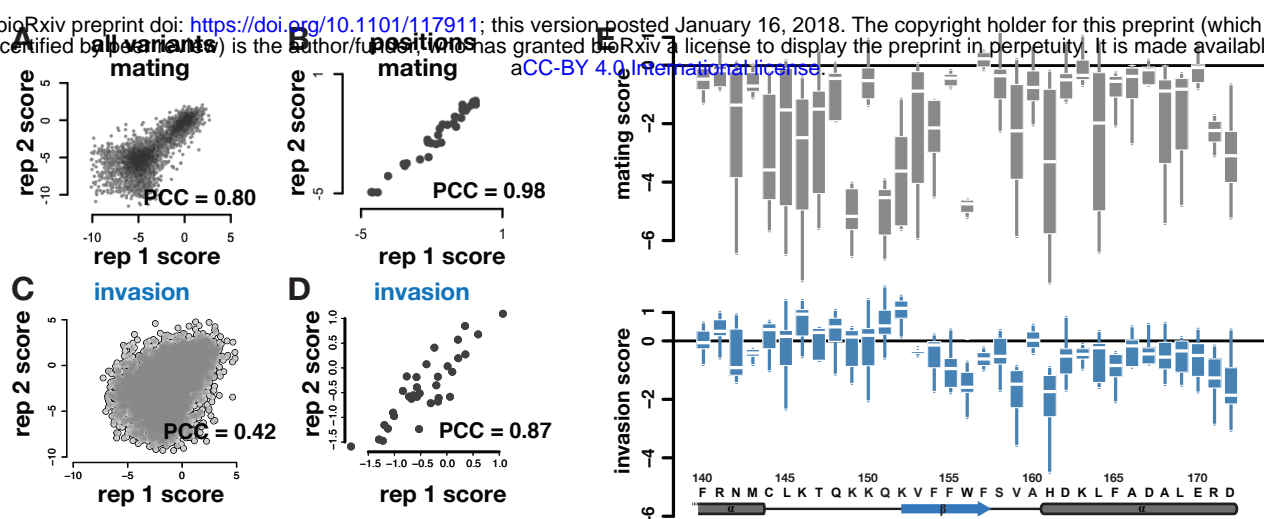

**Fig. 3 - Suppl. Fig 1. Mating and invasion enrichment scores are reproducible across replicate experiments.** Selection for each trait was done in three biological replicates. We computed Pearson correlation coefficients (PCC) between replicates for all variants (A,C) as well as positional means (B,D). Shown are correlations for replicate 1 and 2, results were similar for other replicate pairs. Invasion selections were less well correlated. Nevertheless, positional mean scores were strongly correlated for both traits across replicates. (E) Variability in per-position effect of mutation is shown as boxplots of all mutations tested at each site for mating (grey) and invasion (blue).

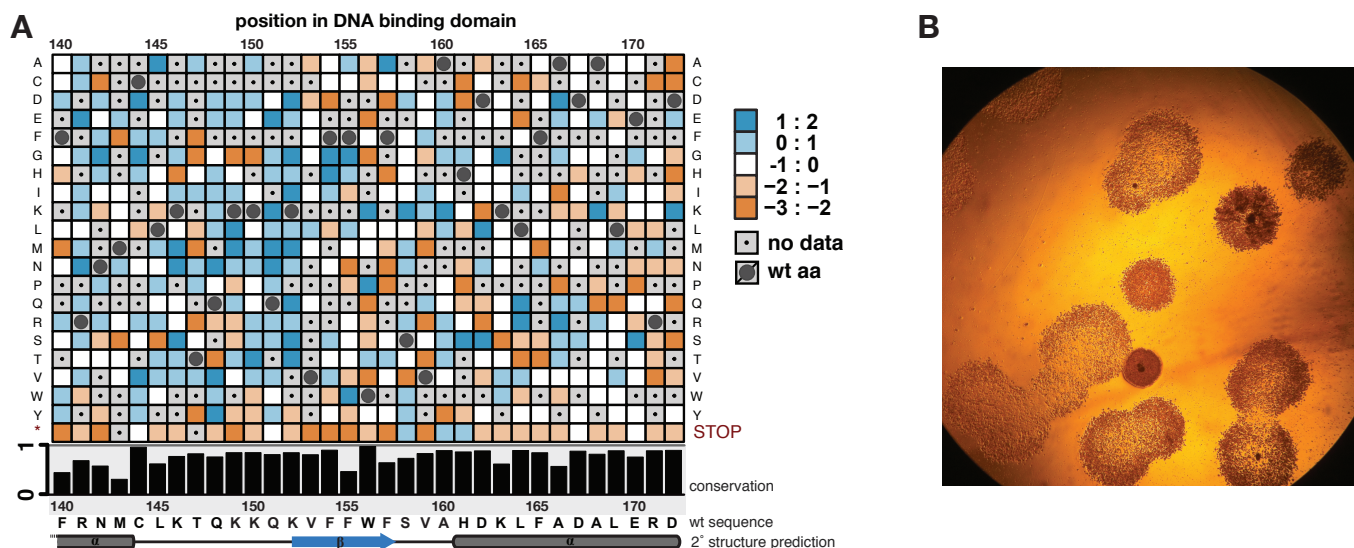

**Fig. 3 - Suppl. Fig 2. Variation in the highly conserved DNA binding domain of Ste12 generates a range of invasion phenotypes.** (A) A heatmap of invasion scores for all single mutants is displayed as in Fig. 3B for mating scores. (B) A 10x magnified image of a washed plate containing invaded colonies with different Ste12 variants shows phenotypic variation in invasion.

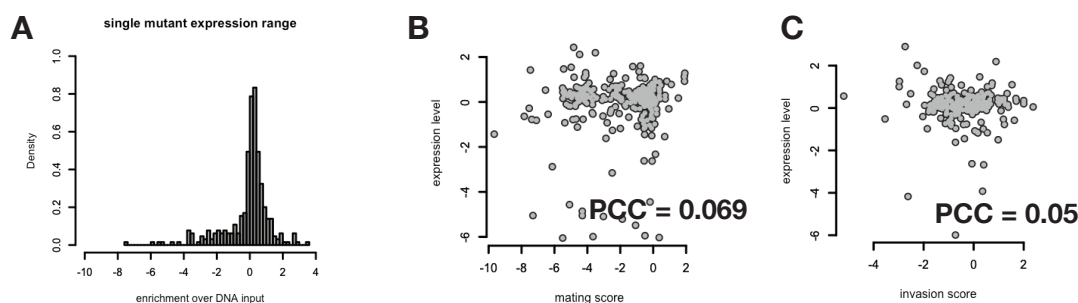

**Fig. 3 - Suppl. Fig 3. Variant expression shows little variation and no correlation with phenotypic effects.** (A) The distribution of log<sub>2</sub> enrichment of transcripts relative to plasmid counts for each Ste12 variant rarely deviates from zero, indicating low variation in expression level among variants. Each variant's expression level is plotted against each variant's trait enrichment score, for (B) mating and (C) invasion, demonstrating that variant expression levels did not affect phenotype.

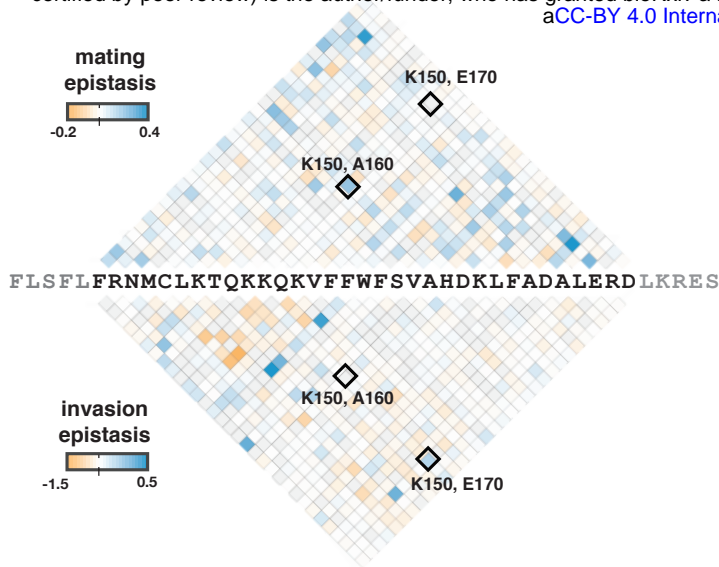

**Fig. 4 - Suppl. Fig 1. Double mutant analysis identifies pairs of positions with strong epistasis, and such pairs differ between mating and invasion.** For each double mutant, we calculated epistasis as the deviation of that mutant's effect from the multiplied effect of its constituent single mutants (see Methods). Scores are displayed as in Fig. 2A; epistasis scores across all combinations of mutations tested at each pair of sites was used to calculate the displayed mean epistasis score. Sites with strong positive (shades of blue) or negative epistasis scores (shades of orange) differ between traits. Strong intramolecular epistasis occurs more frequently between residues in close proximity, suggesting that Ste12 conformation differs between both traits. Two pairs with trait-specific epistatic interactions are indicated in boxes.

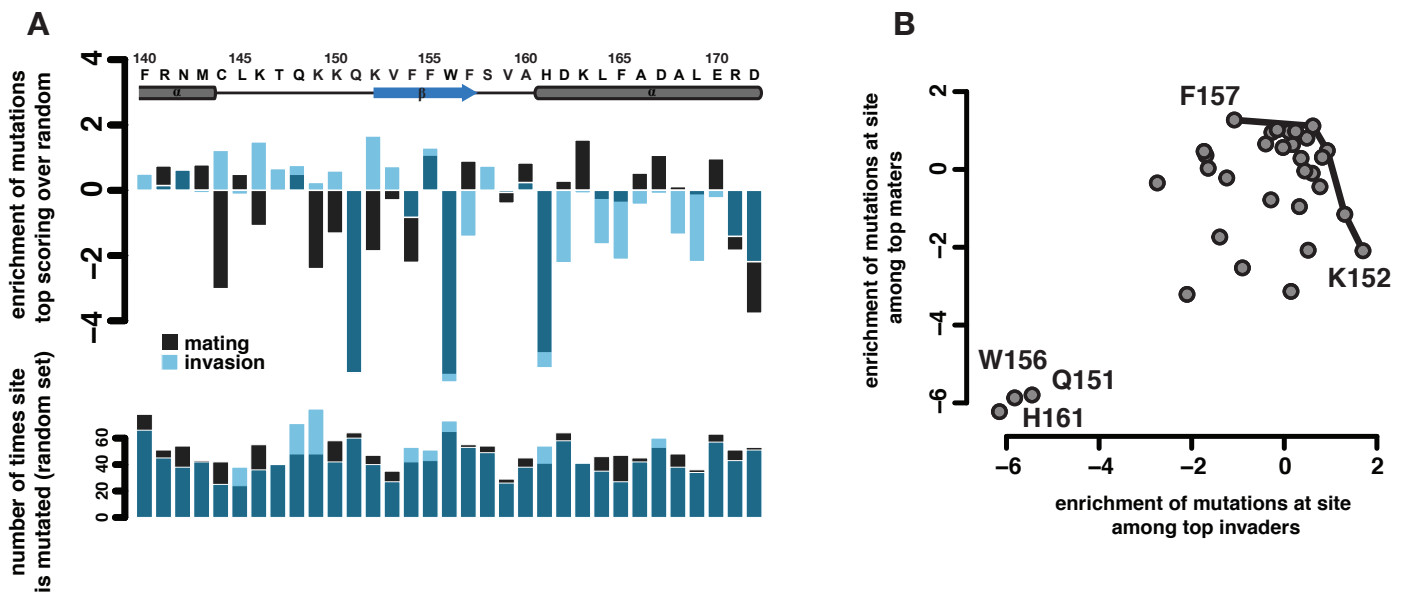

**Fig. 4 - Suppl. Fig 2. Orthogonal analysis reveals positions contributing to ‘separation-of-function’ between mating and invasion.** Per-site mutation frequencies were calculated for the top 750 mating variants, top 750 invasion variants, and a random set of 750 variants from each dataset. (A) Enrichment of per-site mutations for top performing variants in each trait recapitulates bipartite arrangement of effects (‘separation-of-function’), as well as sites increasing one trait at the cost of the other (e.g. see K152 and F157, tradeoff indicated with blue/black bars). (B) Per-site enrichment scores identify similar sites on the empirical Pareto front (Fig. 4B), as well as the same sites in which mutations are deleterious in both traits.

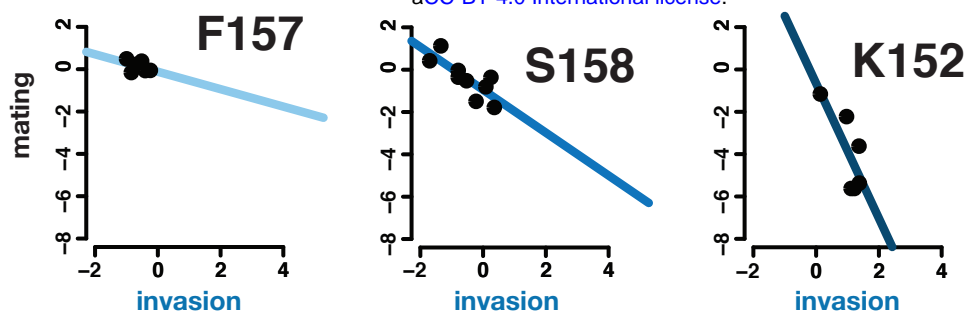

**Fig. 4 - Suppl. Fig 3. Individual mutations tested at sites critical for separation of function between mating and invasion.** Mating and invasion scores for all single amino acid change mutations at each indicated position were plotted, and a simple linear model was fitted. Steeper slopes indicate that mutations at that position are more likely to shift trait preference toward invasion.

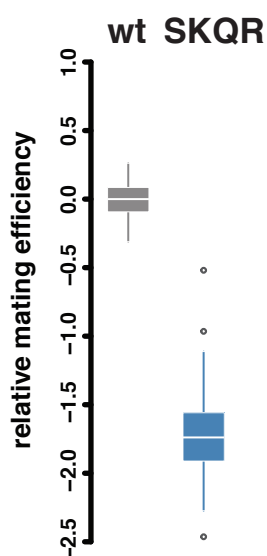

**Fig. 4 - Suppl. Fig 4. SKQR mutant shows decreased mating efficiency.** Because the SKQR variant was not present in our initial Ste12 variant library, we used a standard quantitative mating assay to determine its mating efficiency relative to wild-type Ste12 as in Fig. 4F.

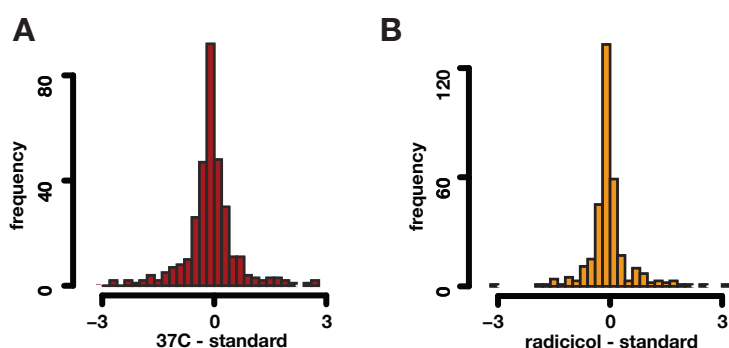

**Fig. 4 - Suppl. Fig 5. The majority of Ste12 variants respond like wild-type Ste12 to increased temperature or Hsp90 inhibition.** The distribution of differences of log<sub>2</sub> mating scores for all single mutants (treated - untreated) are plotted for high-temperature (red, A) and Hsp90-reduced (orange, B) conditions.

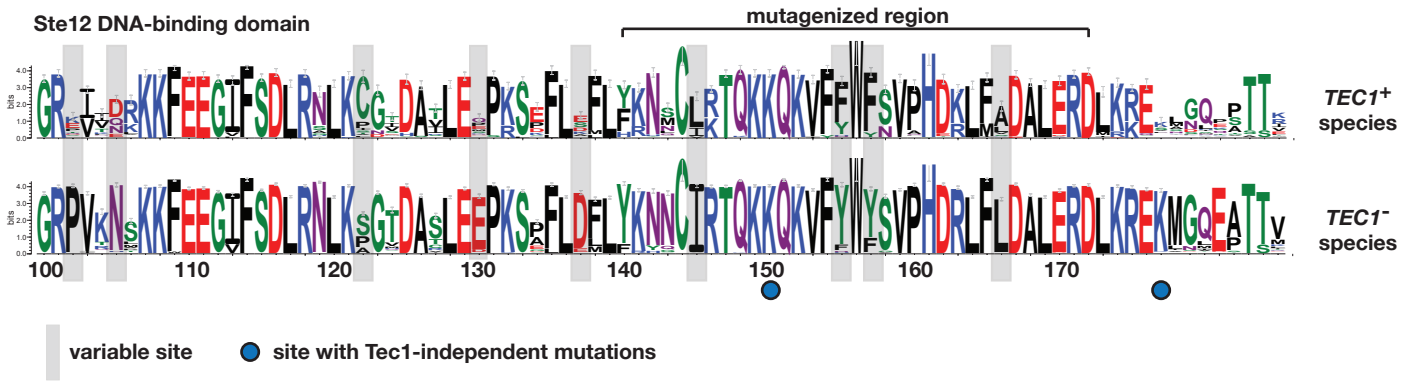

**Fig. 5 - Suppl. Fig 1. Variation in Ste12's DNA-binding domain is associated with presence of *TEC1* gene.** A weblogo of Ste12's DNA-binding domain was generated as in Figure 1D, except that the fungal species were split into two groups: those whose genome contains a copy of *TEC1* (n=333) and those whose do not (n=715).

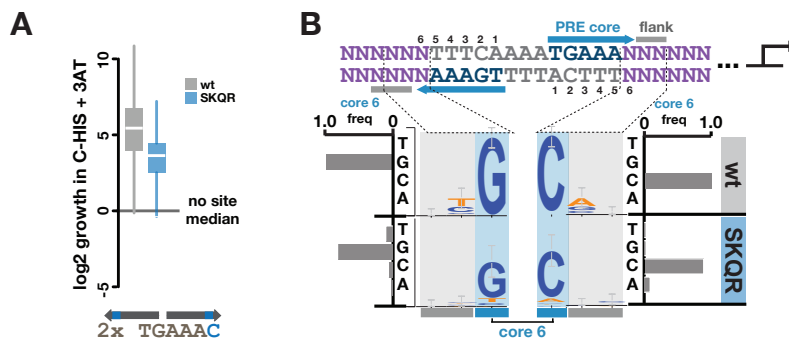

**Fig. 5 - Suppl. Fig 2. SKQR shows reduced activation at perfect match dimeric sites compared to wild-type Ste12, but can activate degenerate sites.** A library of binding sites was cloned into a HIS3 reporter gene and used in growth selections in the BY4741 *ste12Δ* background. (A) The activity of wild-type Ste12 and SKQR variant with all binding sites containing two canonical PREs is shown as a boxplot (n = 725, 747). (B) The *in vivo* sequence preferences for wild-type Ste12 and SKQR are shown as logo plots of three positions (core position 6 and two flanking bases, no preferences were seen at further flanking bases) of each PRE. Grey error bars on logo plots represent 95% confidence interval at each base. Bar charts show the frequency of base preference at core position 6.
